# Supplementary material for: An informational view of accession rarity and allele specificity in germplasm banks for management and conservation
Source: PLoS One. 2018 Feb 28;13(2):e0193346. doi: 10.1371/journal.pone.0193346 (PMC5831390; doi:10.1371/journal.pone.0193346)
Supplement: S1 File — Accession names, rarity and divergence for all hexaploid lines. The members of the core subset are marked in the last column. (CSV) [file pone.0193346.s002.csv]

Accession	GID	Rarity	Divergence	Selection
SEEDDIV2819	266759	0.372250917	0.374157772
SEEDDIV2891	194916	0.347492255	0.351444007
SEEDDIV2899	195959	0.40599603	0.41053859
SEEDDIV2907	191884	0.407932443	0.415266521
SEEDDIV2827	191481	0.397942198	0.406750952
SEEDDIV2835	206877	0.37744087	0.383708366
SEEDDIV2843	207069	0.399794271	0.390047338
SEEDDIV2851	320260	0.362542769	0.370477381
SEEDDIV2859	221689	0.355154231	0.361238275
SEEDDIV2867	221599	0.389385744	0.311326295
SEEDDIV2875	193366	0.402758597	0.4075896
SEEDDIV2883	194722	0.335959865	0.340511167
SEEDDIV2820	225621	0.414585451	0.419259525
SEEDDIV2900	190969	0.398190069	0.352113168
SEEDDIV2908	192276	0.3320752	0.320809086
SEEDDIV2828	223873	0.438761495	0.450959448
SEEDDIV2836	206904	0.35919498	0.360734403
SEEDDIV2844	207116	0.349298588	0.341285829
SEEDDIV2852	320283	0.415832691	0.350931516
SEEDDIV2860	221690	0.358241703	0.298951636
SEEDDIV2868	221621	0.393221692	0.341357647
SEEDDIV2876	193547	0.38381312	0.388227128
SEEDDIV2884	194673	0.446424	0.452483821	Selected
SEEDDIV2893	195040	0.419949385	0.404695836
SEEDDIV2901	190997	0.40043983	0.306582158
SEEDDIV2909	192399	0.382089466	0.36415205
SEEDDIV2829	2249706	0.372330805	0.376761056
SEEDDIV2845	320425	0.404671573	0.404532803
SEEDDIV2853	221528	0.399804158	0.40268868
SEEDDIV2861	221691	0.407440413	0.414445557
SEEDDIV2869	221672	0.378283487	0.388270796
SEEDDIV2877	193633	0.394760937	0.40355694
SEEDDIV2885	194850	0.359293842	0.357829393
SEEDDIV2822	193578	0.388497841	0.386279711
SEEDDIV2894	195067	0.345472985	0.335173225
SEEDDIV2902	191106	0.368872844	0.369392346
SEEDDIV2910	192348	0.406092142	0.403714087
SEEDDIV2830	196078	0.444006461	0.456512794	Selected
SEEDDIV2846	320477	0.408662433	0.419968451
SEEDDIV2854	221684	0.370941602	0.379070063
SEEDDIV2862	221692	0.415710658	0.41932166
SEEDDIV2878	193645	0.384023737	0.3838668
SEEDDIV2823	193528	0.371573075	0.377408926
SEEDDIV2895	195693	0.359071222	0.367813009
SEEDDIV2911	217553	0.371276342	0.25214343
SEEDDIV2831	2249639	0.392477292	0.401281323
SEEDDIV2839	206941	0.418091665	0.423628196
SEEDDIV2847	320518	0.378128846	0.384236222
SEEDDIV2855	221685	0.397510651	0.276887289
SEEDDIV2863	221693	0.402024807	0.31919927
SEEDDIV2879	193745	0.396209061	0.406108709
SEEDDIV2824	193451	0.377463882	0.385053717
SEEDDIV2896	195767	0.364663631	0.367446048
SEEDDIV2904	191328	0.40405022	0.406910006
SEEDDIV2912	221785	0.371730162	0.371865962
SEEDDIV2840	206960	0.361924153	0.368543688
SEEDDIV2848	320576	0.413661632	0.416816719
SEEDDIV2856	221686	0.337467933	0.342222549
SEEDDIV2864	221694	0.391728276	0.275755916
SEEDDIV2872	193234	0.337108008	0.34367179
SEEDDIV2880	193861	0.388350971	0.398273724
SEEDDIV2888	195167	0.392927696	0.366985722
SEEDDIV2825	192215	0.349273922	0.345372575
SEEDDIV2897	195837	0.373300489	0.375329377
SEEDDIV2905	191663	0.351953666	0.362688197
SEEDDIV2841	206973	0.380294265	0.367882529
SEEDDIV2849	320114	0.374581739	0.385399964
SEEDDIV2857	221687	0.340731651	0.343794452
SEEDDIV2865	221696	0.369101259	0.376470538
SEEDDIV2873	193288	0.411046163	0.417122881
SEEDDIV2889	195242	0.37614684	0.370789367
SEEDDIV2826	191519	0.381911729	0.394716157
SEEDDIV2898	195894	0.407217448	0.411606397
SEEDDIV2834	206804	0.415806201	0.420789494
SEEDDIV2842	207051	0.345837838	0.351629279
SEEDDIV2850	320201	0.362889334	0.361481395
SEEDDIV2858	221688	0.371054821	0.376212681
SEEDDIV2866	221697	0.375392213	0.382205455
SEEDDIV2874	193239	0.404871252	0.410816745
SEEDDIV2882	194621	0.395508239	0.406103368
SEEDDIV2890	195517	0.361829223	0.366107057
SEEDDIV2913	221806	0.36549417	0.373205893
SEEDDIV2985	157553	0.356892009	0.360466136
SEEDDIV2993	158789	0.375770584	0.378050508
SEEDDIV2921	225134	0.4224508	0.422770457
SEEDDIV2929	225690	0.411575156	0.244381473
SEEDDIV2945	162260	0.39658785	0.386039396
SEEDDIV2953	157742	0.377364094	0.382213591
SEEDDIV2961	157977	0.369194867	0.368290647
SEEDDIV2969	158023	0.409678003	0.407013309
SEEDDIV2977	150931	0.374422614	0.378962542
SEEDDIV2914	221916	0.357836842	0.342395039
SEEDDIV2986	157528	0.362612972	0.356982769
SEEDDIV2994	158891	0.337759829	0.343710632
SEEDDIV3002	207115	0.399476498	0.400885165
SEEDDIV2922	225157	0.421680123	0.430198264
SEEDDIV2930	157615	0.38179712	0.273824367
SEEDDIV2938	157702	0.363260855	0.36724749
SEEDDIV2946	162359	0.370455351	0.370303773
SEEDDIV2954	157749	0.411674911	0.416572692
SEEDDIV2962	157979	0.377422852	0.384009037
SEEDDIV2970	158038	0.351077301	0.319192091
SEEDDIV2978	150938	0.386587153	0.380576381
SEEDDIV2995	158927	0.338981987	0.327455058
SEEDDIV2923	225158	0.346509806	0.348533066
SEEDDIV2939	162001	0.411408808	0.410773836
SEEDDIV2947	162369	0.339788924	0.334565175
SEEDDIV2955	157834	0.404968512	0.407665385
SEEDDIV2963	157980	0.412864211	0.412283038
SEEDDIV2971	158041	0.406717707	0.406834972
SEEDDIV2979	150961	0.416951657	0.415966083
SEEDDIV2916	221969	0.362619614	0.360320848
SEEDDIV2988	158100	0.337571907	0.321353356
SEEDDIV2996	158980	0.374076257	0.374330501
SEEDDIV2924	225191	0.422930189	0.42439326
SEEDDIV2932	157644	0.427186789	0.440118011	Selected
SEEDDIV2940	162110	0.393752208	0.396383434
SEEDDIV2948	162381	0.368996332	0.374798576
SEEDDIV2964	157992	0.392388535	0.389710534
SEEDDIV2972	158046	0.424075533	0.427027704
SEEDDIV2980	151000	0.408101452	0.412715174
SEEDDIV2917	221695	0.39473085	0.397357508
SEEDDIV2989	158105	0.346554312	0.291741614
SEEDDIV2997	159069	0.363524302	0.375511359
SEEDDIV2925	225260	0.370537177	0.343560603
SEEDDIV2933	157659	0.386033265	0.393306087
SEEDDIV2965	157995	0.435314425	0.44224532	Selected
SEEDDIV2973	158002	0.383825839	0.367371953
SEEDDIV2981	151031	0.3749526	0.384523741
SEEDDIV2918	223719	0.351621041	0.354410636
SEEDDIV2990	158118	0.363959638	0.363149292
SEEDDIV2998	159174	0.362872495	0.365381613
SEEDDIV3006	266698	0.452787149	0.45927323
SEEDDIV2926	225389	0.478820071	0.442797866
SEEDDIV2934	157662	0.413848363	0.420340835
SEEDDIV2942	225409	0.38200455	0.38504113
SEEDDIV2950	157704	0.365188761	0.364745633
SEEDDIV2966	158008	0.395422233	0.398222721
SEEDDIV2974	158051	0.338366419	0.338011969
SEEDDIV2982	151101	0.405068994	0.410564545
SEEDDIV2919	223786	0.433070077	0.432796714
SEEDDIV2991	158112	0.359668099	0.362479919
SEEDDIV2999	159222	0.381658634	0.381544908
SEEDDIV2927	225476	0.423615946	0.423002218
SEEDDIV2935	157632	0.354248717	0.359021576
SEEDDIV2943	162205	0.40839865	0.406350177
SEEDDIV2951	157733	0.416849692	0.417941058
SEEDDIV2959	157975	0.378435946	0.388400797
SEEDDIV2967	158010	0.392856144	0.310040719
SEEDDIV2928	225592	0.419147072	0.416323837
SEEDDIV2944	162216	0.403577105	0.407299249
SEEDDIV2952	157729	0.399095449	0.397893276
SEEDDIV2960	157976	0.378658417	0.385172186
SEEDDIV2968	158016	0.362010662	0.358087764
SEEDDIV2976	158057	0.35896979	0.356974732
SEEDDIV847	194004	0.37850158	0.376757528
SEEDDIV919	194467	0.423047698	0.433447759	Selected
SEEDDIV927	194475	0.422642298	0.436687238	Selected
SEEDDIV935	194603	0.431089844	0.443124865
SEEDDIV855	194013	0.351999015	0.361881603
SEEDDIV863	194023	0.435430119	0.446921031	Selected
SEEDDIV871	194031	0.384959493	0.37989828
SEEDDIV879	194039	0.397831163	0.403489021
SEEDDIV887	194236	0.402801594	0.416594836	Selected
SEEDDIV895	194444	0.417616653	0.42371146
SEEDDIV903	194451	0.408540503	0.404610123
SEEDDIV911	194459	0.435199108	0.443959744
SEEDDIV848	194005	0.4485958	0.447501265	Selected
SEEDDIV920	194468	0.417984999	0.428820292
SEEDDIV928	194476	0.426407578	0.433927416
SEEDDIV936	194604	0.424111833	0.430035986
SEEDDIV856	193952	0.373292161	0.384655607
SEEDDIV864	194024	0.391009747	0.400161163
SEEDDIV872	194032	0.393985443	0.407378478
SEEDDIV880	194040	0.384604648	0.395843801
SEEDDIV888	194237	0.40093108	0.410310026
SEEDDIV896	194445	0.417300872	0.427135986
SEEDDIV904	194453	0.422030576	0.434422957
SEEDDIV912	194460	0.437634216	0.445773089
SEEDDIV849	194006	0.359497723	0.362368495
SEEDDIV921	194469	0.423617988	0.434232962	Selected
SEEDDIV929	194499	0.423335728	0.428257694
SEEDDIV937	194605	0.410277913	0.423423388
SEEDDIV857	194015	0.390492	0.397333043
SEEDDIV865	194025	0.43090996	0.441562349	Selected
SEEDDIV873	194034	0.371621166	0.383897259
SEEDDIV881	194041	0.408729432	0.421290081
SEEDDIV889	194238	0.400478759	0.40479848
SEEDDIV897	194380	0.512570453	0.521474144	Selected
SEEDDIV905	194454	0.42662849	0.436339202	Selected
SEEDDIV913	194461	0.416701907	0.424617635
SEEDDIV850	191005	0.389435872	0.387794618
SEEDDIV922	194470	0.439316251	0.447806931	Selected
SEEDDIV930	194508	0.41909946	0.427711416
SEEDDIV938	194606	0.430640318	0.442659722
SEEDDIV858	194017	0.435054298	0.442005106
SEEDDIV866	194026	0.412290789	0.421017272	Selected
SEEDDIV874	194035	0.381186067	0.395368356
SEEDDIV882	194042	0.40068577	0.413122075
SEEDDIV890	194239	0.401976341	0.411454038
SEEDDIV898	194446	0.420582749	0.431485163
SEEDDIV906	194455	0.418148594	0.427459849
SEEDDIV914	194463	0.410305182	0.423311544
SEEDDIV851	194007	0.450668289	0.442189788
SEEDDIV923	194471	0.423178772	0.425243168
SEEDDIV931	194599	0.428624981	0.427940539
SEEDDIV939	191059	0.402478867	0.401805459
SEEDDIV859	194018	0.38801959	0.395008322
SEEDDIV867	193953	0.387293836	0.393121528
SEEDDIV875	194036	0.40270292	0.415408843
SEEDDIV883	194043	0.374534457	0.381601215
SEEDDIV891	194240	0.405466468	0.412997039
SEEDDIV899	194447	0.424215391	0.43143533
SEEDDIV907	194381	0.41926516	0.426321717
SEEDDIV915	194464	0.429106475	0.435894912	Selected
SEEDDIV852	194009	0.444067455	0.441673123
SEEDDIV924	194472	0.417716396	0.424648324
SEEDDIV932	194600	0.405919504	0.415892375
SEEDDIV940	194608	0.40811744	0.41704422
SEEDDIV860	194019	0.396939622	0.407359752
SEEDDIV868	194027	0.441491487	0.446387897
SEEDDIV876	194037	0.404201895	0.413229406
SEEDDIV884	194044	0.371903225	0.378115853
SEEDDIV892	194241	0.395725447	0.404689997
SEEDDIV900	194448	0.418323803	0.426534379
SEEDDIV908	194456	0.423422695	0.428296394
SEEDDIV916	194465	0.406094613	0.40674992
SEEDDIV853	194010	0.386488514	0.380574053
SEEDDIV925	194473	0.416280127	0.420409306
SEEDDIV933	194601	0.449703552	0.456604807	Selected
SEEDDIV861	194020	0.390087072	0.397381322
SEEDDIV869	194028	0.38627781	0.397892468
SEEDDIV877	194038	0.400404017	0.404785784
SEEDDIV885	194134	0.404139502	0.361324051
SEEDDIV893	194242	0.404042114	0.413502247
SEEDDIV901	194449	0.419613342	0.426817764
SEEDDIV909	194457	0.411370895	0.410620305
SEEDDIV917	194466	0.435689918	0.44491115
SEEDDIV854	194011	0.385332946	0.38337887
SEEDDIV926	194474	0.427137298	0.434007616
SEEDDIV934	194602	0.415735063	0.425795297
SEEDDIV862	194021	0.410725532	0.401454235
SEEDDIV870	194030	0.37515167	0.386416003
SEEDDIV878	193954	0.365982015	0.376283012
SEEDDIV886	194235	0.399065226	0.402779221
SEEDDIV894	194243	0.403292698	0.410764243
SEEDDIV902	194450	0.422290468	0.434293791
SEEDDIV910	194458	0.419406925	0.42931903
SEEDDIV918	194382	0.423958083	0.433200465
SEEDDIV14726	192292	0.38541579	0.370517516
SEEDDIV14798	217551	0.41183091	0.417009613
SEEDDIV14806	217556	0.407577376	0.405922951
SEEDDIV14814	159060	0.397599436	0.402668842
SEEDDIV14734	192303	0.40532126	0.405642747
SEEDDIV14742	192337	0.368039819	0.364199766
SEEDDIV14750	192328	0.400141667	0.366748718
SEEDDIV14758	192374	0.418171135	0.425507889
SEEDDIV14766	192360	0.398399317	0.396670395
SEEDDIV14774	217507	0.408220479	0.410839509
SEEDDIV14782	217511	0.427300237	0.393410422
SEEDDIV14790	217526	0.462583585	0.465242568
SEEDDIV14727	192293	0.385809508	0.341801694
SEEDDIV14799	217541	0.458844879	0.461564008
SEEDDIV14807	217495	0.451874942	0.458360519	Selected
SEEDDIV14815	159059	0.388787473	0.377299908
SEEDDIV14735	192311	0.356919739	0.327348297
SEEDDIV14743	192317	0.355689849	0.343931708
SEEDDIV14751	192332	0.346365223	0.345009711
SEEDDIV14759	192371	0.425208807	0.42851544
SEEDDIV14767	192357	0.385963244	0.360565834
SEEDDIV14775	217515	0.412928059	0.419556887
SEEDDIV14783	217512	0.452963484	0.452166693
SEEDDIV14791	217530	0.427842531	0.425852031
SEEDDIV14728	192294	0.378364759	0.333118982
SEEDDIV14800	217540	0.451065795	0.457793041	Selected
SEEDDIV14808	217499	0.369376003	0.371993706
SEEDDIV14816	159058	0.391194068	0.397196726
SEEDDIV14736	192350	0.370545068	0.37246656
SEEDDIV14744	192313	0.376202028	0.383615556
SEEDDIV14752	192319	0.405578684	0.40921688
SEEDDIV14760	192375	0.427410046	0.429969
SEEDDIV14768	192283	0.419810645	0.409811106
SEEDDIV14776	217514	0.414655675	0.40073709
SEEDDIV14792	217496	0.390634186	0.393396313
SEEDDIV14729	192296	0.389355593	0.380287133
SEEDDIV14801	217539	0.414419633	0.40487913
SEEDDIV14809	217501	0.350977721	0.355270036
SEEDDIV14817	159057	0.389964183	0.397794039
SEEDDIV14737	192343	0.441949051	0.417516919
SEEDDIV14745	192312	0.366599698	0.288947464
SEEDDIV14753	192323	0.338881333	0.328698344
SEEDDIV14761	192376	0.383912943	0.355436764
SEEDDIV14769	192354	0.365216114	0.359984925
SEEDDIV14777	217524	0.357588086	0.35782626
SEEDDIV14785	192377	0.421385358	0.41702487
SEEDDIV14793	217502	0.455390734	0.455581347
SEEDDIV14730	192297	0.361685217	0.343905171
SEEDDIV14802	217493	0.357461924	0.36274763
SEEDDIV14810	221762	0.388963844	0.383074049
SEEDDIV14818	159056	0.429343824	0.410973204
SEEDDIV14738	192339	0.419112885	0.412766487
SEEDDIV14746	192331	0.405515309	0.392534599
SEEDDIV14754	192366	0.416417206	0.416335321
SEEDDIV14762	192351	0.365426611	0.363620899
SEEDDIV14770	192356	0.363894417	0.369894436
SEEDDIV14778	217510	0.38800737	0.39505145
SEEDDIV14786	217492	0.455237234	0.461385708
SEEDDIV14794	217552	0.390030206	0.385537554
SEEDDIV14731	192298	0.43494072	0.405878375
SEEDDIV14803	217537	0.383979203	0.377898821
SEEDDIV14811	217500	0.383723699	0.384987631
SEEDDIV14819	159055	0.37043355	0.367587981
SEEDDIV14739	192338	0.398822134	0.400948628
SEEDDIV14747	192333	0.401422573	0.406698288
SEEDDIV14755	192365	0.414434684	0.410625305
SEEDDIV14763	192359	0.364782556	0.368966341
SEEDDIV14771	192353	0.365589109	0.368816591
SEEDDIV14779	217508	0.417942967	0.426701389
SEEDDIV14787	217517	0.37948752	0.375702972
SEEDDIV14795	217536	0.410966682	0.411736418
SEEDDIV14732	192300	0.432512393	0.416268848
SEEDDIV14804	217542	0.45256929	0.45184746	Selected
SEEDDIV14812	159061	0.42124299	0.424428973
SEEDDIV14740	192314	0.38008044	0.382025671
SEEDDIV14748	192318	0.351748528	0.335091697
SEEDDIV14756	192370	0.42677242	0.427709693
SEEDDIV14764	192364	0.419177592	0.428594348
SEEDDIV14772	217528	0.453277102	0.453626523	Selected
SEEDDIV14780	217503	0.455958921	0.461437801
SEEDDIV14788	217525	0.451057909	0.448638364
SEEDDIV14796	217534	0.378685137	0.380856786
SEEDDIV14733	192302	0.377252928	0.354679718
SEEDDIV14805	217554	0.413175461	0.421601025
SEEDDIV14813	159033	0.435497254	0.438145815
SEEDDIV14749	192329	0.401858685	0.407966632
SEEDDIV14757	192373	0.410859532	0.41054697
SEEDDIV14765	192363	0.418759703	0.424780605
SEEDDIV14773	217516	0.409935902	0.4193602
SEEDDIV14781	217490	0.370043483	0.368782623
SEEDDIV14789	217529	0.457607822	0.461147593
SEEDDIV14797	217532	0.452329833	0.456660734
SEEDDIV14820	159053	0.386108302	0.357574508
SEEDDIV14892	159084	0.392426541	0.388761008
SEEDDIV14900	159077	0.404575037	0.36323469
SEEDDIV14908	159109	0.381626223	0.3829774
SEEDDIV14828	159046	0.353352519	0.357670434
SEEDDIV14836	159037	0.366027473	0.371408211
SEEDDIV14844	159070	0.381859757	0.364754142
SEEDDIV14852	159104	0.350973566	0.345037666
SEEDDIV14860	159095	0.358566858	0.363001427
SEEDDIV14868	159148	0.404451096	0.393532812
SEEDDIV14876	159139	0.391092623	0.359065393
SEEDDIV14884	159121	0.390168337	0.380773735
SEEDDIV14821	159054	0.388713122	0.375530111
SEEDDIV14893	159081	0.370791791	0.357481832
SEEDDIV14901	159116	0.413997508	0.228293307
SEEDDIV14909	159108	0.370057669	0.359674945
SEEDDIV14829	159045	0.351559583	0.356033561
SEEDDIV14837	159036	0.362493973	0.357794142
SEEDDIV14845	159068	0.390761223	0.391922024
SEEDDIV14853	159103	0.383244131	0.387894745
SEEDDIV14861	159094	0.356171995	0.362940879
SEEDDIV14869	159147	0.404334991	0.32710004
SEEDDIV14877	159138	0.43805392	0.407432845
SEEDDIV14885	159082	0.394728564	0.377799031
SEEDDIV14822	159052	0.447387876	0.437291578
SEEDDIV14894	159080	0.38140576	0.386293686
SEEDDIV14902	159115	0.41751362	0.423430781
SEEDDIV14910	159107	0.3517888	0.352993045
SEEDDIV14830	159044	0.351673457	0.35933111
SEEDDIV14838	159035	0.3574228	0.359352809
SEEDDIV14846	159067	0.392806887	0.373930014
SEEDDIV14854	159101	0.354292687	0.354103293
SEEDDIV14862	159076	0.400567013	0.398601522	Selected
SEEDDIV14870	159146	0.373631498	0.365817205
SEEDDIV14878	159137	0.436094534	0.416264926
SEEDDIV14886	159149	0.398201998	0.384751932
SEEDDIV14823	159051	0.448962792	0.432202445
SEEDDIV14895	159079	0.3897605	0.33595728
SEEDDIV14903	159114	0.417067373	0.421525202
SEEDDIV14911	159143	0.400696358	0.406836292	Selected
SEEDDIV14831	159043	0.356810428	0.349160551
SEEDDIV14839	159074	0.412336436	0.40954875
SEEDDIV14847	159066	0.385449702	0.383892958
SEEDDIV14855	159099	0.354354605	0.364500533
SEEDDIV14863	159093	0.401734821	0.396726274
SEEDDIV14871	159145	0.443207716	0.422280943
SEEDDIV14879	159134	0.384921105	0.374846254
SEEDDIV14824	159032	0.356679996	0.352293877
SEEDDIV14896	159078	0.386503367	0.386252362
SEEDDIV14904	159113	0.396806733	0.394509857
SEEDDIV14912	159106	0.376582365	0.383126234
SEEDDIV14832	159083	0.391466854	0.396411083
SEEDDIV14840	159073	0.364624345	0.354642858
SEEDDIV14848	159065	0.438133506	0.435731427
SEEDDIV14856	159098	0.356043517	0.356982626
SEEDDIV14864	159092	0.375320519	0.377617682
SEEDDIV14872	159142	0.401542771	0.382320104
SEEDDIV14880	159133	0.360765588	0.329619949
SEEDDIV14825	159050	0.448007773	0.437824815
SEEDDIV14897	159119	0.358788087	0.350731029
SEEDDIV14905	159112	0.397375473	0.40138228
SEEDDIV14913	159136	0.412499421	0.408179729
SEEDDIV14833	159075	0.385080748	0.39111043
SEEDDIV14841	159072	0.3662188	0.366266916
SEEDDIV14849	159064	0.435679183	0.412621583
SEEDDIV14865	159091	0.355653569	0.357980706
SEEDDIV14873	159144	0.436421123	0.432064693
SEEDDIV14881	159132	0.351278001	0.333937938
SEEDDIV14889	159088	0.39647763	0.384191343
SEEDDIV14826	159048	0.437856316	0.429534122
SEEDDIV14898	159118	0.361198584	0.313287513
SEEDDIV14906	159111	0.393980817	0.400212357
SEEDDIV14834	159039	0.351882908	0.357712364
SEEDDIV14842	159071	0.479831814	0.471628677
SEEDDIV14850	159063	0.385720547	0.388090081
SEEDDIV14858	159097	0.380105451	0.362637668
SEEDDIV14866	159090	0.359554977	0.304878237
SEEDDIV14874	159122	0.3962526	0.373883639
SEEDDIV14882	159131	0.354037575	0.330385126
SEEDDIV14890	159086	0.410068573	0.384980237
SEEDDIV14827	159047	0.399892582	0.387599651
SEEDDIV14899	159117	0.369268652	0.336454751
SEEDDIV14907	159110	0.39013588	0.395323571
SEEDDIV14835	159038	0.351936515	0.358992781
SEEDDIV14843	159034	0.379150854	0.382228561
SEEDDIV14851	159062	0.395647843	0.397544057
SEEDDIV14859	159096	0.380258998	0.378210397
SEEDDIV14867	159089	0.351690663	0.360654973
SEEDDIV14875	159140	0.390410776	0.387565437
SEEDDIV14883	159130	0.393510014	0.385328095
SEEDDIV14891	159085	0.436033358	0.440194468
SEEDDIV14914	158605	0.38418896	0.373163807
SEEDDIV14986	158763	0.393840638	0.388667617
SEEDDIV14994	158733	0.381974455	0.389537387
SEEDDIV14922	158638	0.371524142	0.328873258
SEEDDIV14930	158692	0.393635623	0.397235205
SEEDDIV14938	158698	0.44083817	0.417753674
SEEDDIV14946	158706	0.344541559	0.347252069
SEEDDIV14954	158727	0.387675571	0.396531812
SEEDDIV14962	158730	0.394213344	0.398314805
SEEDDIV14970	158746	0.405274992	0.395702133
SEEDDIV14978	158755	0.391840701	0.394713379
SEEDDIV14915	158606	0.373899683	0.362997202
SEEDDIV14987	158765	0.385966615	0.387647364
SEEDDIV14995	158774	0.384141089	0.383397686
SEEDDIV15003	158938	0.3597888	0.357747097
SEEDDIV14923	158639	0.357996299	0.362467601
SEEDDIV14931	158693	0.389458741	0.38805524
SEEDDIV14939	158699	0.371426169	0.366949122
SEEDDIV14947	158707	0.369440123	0.374496401
SEEDDIV14955	158728	0.387769243	0.387853672
SEEDDIV14963	158739	0.397860143	0.394777844
SEEDDIV14971	158747	0.391101166	0.362840642
SEEDDIV14979	158757	0.388519812	0.395751302
SEEDDIV14916	158607	0.378008743	0.361708747
SEEDDIV14988	158767	0.414342901	0.413834984
SEEDDIV14996	158775	0.402156091	0.404780434
SEEDDIV15004	158939	0.364330632	0.367533572
SEEDDIV14924	158640	0.377373858	0.377911496
SEEDDIV14932	158694	0.392784419	0.396366935
SEEDDIV14948	158722	0.392910647	0.39203409
SEEDDIV14956	158729	0.392865278	0.393660039
SEEDDIV14964	158740	0.39592044	0.400390198
SEEDDIV14972	158748	0.393415799	0.394938661
SEEDDIV14980	158758	0.351143159	0.34578753
SEEDDIV14917	158608	0.376422842	0.35915247
SEEDDIV14989	158768	0.390178536	0.394893944
SEEDDIV14997	158776	0.401252321	0.396843507
SEEDDIV15005	158940	0.34954108	0.351640013
SEEDDIV14925	158641	0.491048461	0.49054448	Selected
SEEDDIV14941	158701	0.394598642	0.394127923
SEEDDIV14949	158723	0.390267305	0.39011197
SEEDDIV14957	158682	0.354070772	0.357360067
SEEDDIV14965	158741	0.394241878	0.396657458
SEEDDIV14973	158731	0.397702618	0.396338129
SEEDDIV14981	158759	0.386379531	0.391972355
SEEDDIV14918	158609	0.3719467	0.342329207
SEEDDIV14990	158769	0.386300444	0.386839137
SEEDDIV14998	158734	0.385458957	0.389293979
SEEDDIV15006	158941	0.355181851	0.357628721
SEEDDIV14926	158678	0.355432142	0.356738621
SEEDDIV14934	158695	0.399474142	0.39707961
SEEDDIV14942	158702	0.393132268	0.388202018
SEEDDIV14950	158724	0.404917968	0.396414714
SEEDDIV14958	158685	0.354933181	0.355531284
SEEDDIV14966	158742	0.392971715	0.396166567
SEEDDIV14974	158749	0.391831265	0.395469518
SEEDDIV14982	158760	0.391257937	0.389752573
SEEDDIV14919	158610	0.370810911	0.359505414
SEEDDIV14991	158770	0.38537184	0.388440973
SEEDDIV14999	158935	0.356923947	0.352086159
SEEDDIV15007	158942	0.341487102	0.347192823
SEEDDIV14927	158689	0.377225071	0.377307206
SEEDDIV14935	158696	0.435452146	0.437169689
SEEDDIV14943	158703	0.390109624	0.391254004
SEEDDIV14959	158686	0.356641351	0.352050147
SEEDDIV14967	158743	0.377714031	0.382168823
SEEDDIV14975	158750	0.396469207	0.395615515
SEEDDIV14920	158677	0.380026956	0.365136586
SEEDDIV14992	158771	0.355042131	0.364614616
SEEDDIV15000	158936	0.350202473	0.352770032
SEEDDIV14928	158690	0.379916197	0.383074049
SEEDDIV14936	158697	0.437294081	0.441636666
SEEDDIV14944	158704	0.446078827	0.448235655
SEEDDIV14952	158725	0.395973143	0.395137457
SEEDDIV14960	158687	0.356010437	0.359213604
SEEDDIV14968	158744	0.394660706	0.399385367
SEEDDIV14976	158751	0.406812547	0.405208735
SEEDDIV14984	158732	0.402107526	0.406662813
SEEDDIV14921	158636	0.409499697	0.39459256
SEEDDIV14993	158773	0.392319614	0.39761934
SEEDDIV15001	158937	0.356422792	0.354377896
SEEDDIV14929	158691	0.398451564	0.398412844
SEEDDIV14937	158679	0.440750934	0.445950955
SEEDDIV14945	158705	0.439798512	0.439492184
SEEDDIV14953	158726	0.391988916	0.399090047
SEEDDIV14961	158754	0.391274159	0.392959394
SEEDDIV14969	158745	0.381772816	0.388353938
SEEDDIV14977	158753	0.381643865	0.388216827
SEEDDIV14985	158762	0.392318775	0.395012336
SEEDDIV15008	158052	0.491855315	0.487766729	Selected
SEEDDIV15016	158006	0.388597802	0.239441099
SEEDDIV15048	150930	0.434427333	0.4394243
SEEDDIV15009	158053	0.375785481	0.382209919
SEEDDIV15017	158056	0.401181397	0.407484838
SEEDDIV15025	150889	0.401167189	0.392648991
SEEDDIV15049	150929	0.459794258	0.458858007	Selected
SEEDDIV15010	158054	0.388710245	0.381057859
SEEDDIV15034	150899	0.377665912	0.38328617
SEEDDIV15050	150927	0.393146407	0.383208639
SEEDDIV15083	150935	0.429084497	0.422794659
SEEDDIV15051	150926	0.428384038	0.432049127	Selected
SEEDDIV15075	150992	0.391352119	0.387705658
SEEDDIV15012	158055	0.428658087	0.392446288
SEEDDIV15084	150934	0.378121697	0.367054823
SEEDDIV15028	150892	0.41961704	0.405266873
SEEDDIV15013	158003	0.453649984	0.44931568	Selected
SEEDDIV15085	150932	0.387246901	0.388620408
SEEDDIV15029	150893	0.485518755	0.43781675
SEEDDIV15037	158058	0.442472046	0.436747702	Selected
SEEDDIV15014	158004	0.402637122	0.403068952
SEEDDIV15054	158060	0.422806747	0.416043408
SEEDDIV15070	150956	0.442704489	0.431801392
SEEDDIV15015	158005	0.392989729	0.395682559
SEEDDIV15087	150969	0.448809122	0.443921525	Selected
SEEDDIV15023	150971	0.419050217	0.419475971
SEEDDIV15102	2249320	0.411253553	0.420068361
SEEDDIV15174	2249856	0.394925724	0.40152587
SEEDDIV15110	2249313	0.420231714	0.429151571
SEEDDIV15126	2249343	0.401387781	0.387222518
SEEDDIV15134	2249896	0.434434926	0.439930595	Selected
SEEDDIV15142	2249889	0.382787208	0.389784806
SEEDDIV15150	2249882	0.3619521	0.37194149
SEEDDIV15103	2249319	0.421577835	0.421176226
SEEDDIV15175	2249855	0.398882416	0.404409198
SEEDDIV15111	2249348	0.413322748	0.425475946
SEEDDIV15127	2249311	0.410301179	0.416302682
SEEDDIV15135	2249895	0.378843401	0.388382287
SEEDDIV15143	2249888	0.379344102	0.384967112
SEEDDIV15151	2249881	0.399117686	0.408988696
SEEDDIV15159	2249873	0.375944188	0.387574665
SEEDDIV15167	2249871	0.405488677	0.4175198	Selected
SEEDDIV15104	2249318	0.421992542	0.421098125
SEEDDIV15176	2249854	0.366852206	0.367977832
SEEDDIV15112	2249312	0.415313538	0.426284826
SEEDDIV15136	2249894	0.420168441	0.431210487
SEEDDIV15144	2249887	0.364058201	0.370351142
SEEDDIV15152	2249880	0.368764338	0.378666768
SEEDDIV15160	2249308	0.374667262	0.383470414
SEEDDIV15168	2249862	0.376616906	0.38663203
SEEDDIV15105	2249317	0.426627113	0.4222189
SEEDDIV15177	2249853	0.380164251	0.388530151
SEEDDIV15113	2249328	0.412316849	0.422139492
SEEDDIV15129	2249901	0.410810409	0.416661723
SEEDDIV15137	2249893	0.380462917	0.392072305
SEEDDIV15145	2249886	0.369997979	0.380465258
SEEDDIV15153	2249879	0.402000261	0.410069708
SEEDDIV15161	2249872	0.380380852	0.37857412
SEEDDIV15169	2249861	0.359409256	0.371144443
SEEDDIV15106	2249316	0.426141673	0.420701914
SEEDDIV15178	2249870	0.379436546	0.386424279
SEEDDIV15114	2249327	0.411492531	0.417562283
SEEDDIV15130	2249900	0.353239479	0.357233321
SEEDDIV15138	2249310	0.407429005	0.411641433
SEEDDIV15146	2249885	0.382446223	0.390755524
SEEDDIV15154	2249878	0.381229485	0.388690671
SEEDDIV15162	2249307	0.40409937	0.413387503
SEEDDIV15170	2249860	0.423923625	0.433148235
SEEDDIV15107	2249315	0.419312122	0.41323515
SEEDDIV15179	2249852	0.407962067	0.413063713
SEEDDIV15115	2249326	0.414806583	0.427611977	Selected
SEEDDIV15131	2249899	0.394027741	0.398959677
SEEDDIV15147	2249884	0.37984226	0.38950446
SEEDDIV15155	2249877	0.364551959	0.37289484
SEEDDIV15163	2249306	0.375439517	0.385749205
SEEDDIV15171	2249859	0.42109115	0.432873897
SEEDDIV15108	2249832	0.438877774	0.428334428
SEEDDIV15180	2249851	0.382430275	0.392174844
SEEDDIV15116	2249325	0.416611794	0.426836613
SEEDDIV15124	2249345	0.417115408	0.423872161
SEEDDIV15132	2249898	0.411663744	0.416597013
SEEDDIV15140	2249891	0.403804983	0.411625416
SEEDDIV15148	2249883	0.377342458	0.387512441
SEEDDIV15156	2249876	0.392632387	0.399622495
SEEDDIV15164	2249305	0.415104971	0.424650789
SEEDDIV15172	2249858	0.38402165	0.391958873
SEEDDIV15109	2249314	0.42552041	0.425547041
SEEDDIV15117	2249324	0.415637632	0.42412164
SEEDDIV15125	2249344	0.416391627	0.425232322
SEEDDIV15133	2249897	0.431055453	0.436529645
SEEDDIV15141	2249890	0.398311866	0.403530574
SEEDDIV15149	2249309	0.419136852	0.427426825
SEEDDIV15157	2249875	0.402991783	0.408584164
SEEDDIV15165	2249904	0.38977699	0.397466002
SEEDDIV15173	2249857	0.390689006	0.396602363
SEEDDIV15254	2249834	0.455429683	0.45756281	Selected
SEEDDIV15262	2249842	0.403598197	0.380939987
SEEDDIV15270	2249849	0.391818561	0.397257271
SEEDDIV15255	2249833	0.400673506	0.404419645
SEEDDIV15263	2249869	0.414676084	0.418066402
SEEDDIV15256	2249835	0.388409634	0.386464184
SEEDDIV15264	2249843	0.43715288	0.435756712	Selected
SEEDDIV15257	2249836	0.381343499	0.366767398
SEEDDIV15265	2249844	0.383825223	0.382496737
SEEDDIV15258	2249837	0.413218978	0.413922498
SEEDDIV15266	2249845	0.386018917	0.384869091
SEEDDIV15259	2249838	0.409091972	0.408389299
SEEDDIV15267	2249846	0.410575759	0.396898907
SEEDDIV15260	2249840	0.405011474	0.403079769
SEEDDIV15268	2249847	0.384713435	0.386382671
SEEDDIV15252	2249839	0.427483119	0.410363318
SEEDDIV15261	2249841	0.334903463	0.334463843
SEEDDIV15269	2249848	0.432848168	0.435901404
SEEDDIV15253	2249868	0.389278023	0.377813386
SEEDDIV15275	191718	0.434297339	0.389735595
SEEDDIV15347	192086	0.429540836	0.437909408
SEEDDIV15363	150973	0.379540569	0.38137957
SEEDDIV15283	191731	0.414098567	0.411538996
SEEDDIV15291	191741	0.428065954	0.439560692
SEEDDIV15299	191752	0.415660718	0.421567754	Selected
SEEDDIV15307	191767	0.416336572	0.407946971
SEEDDIV15315	191775	0.405600773	0.411618813
SEEDDIV15323	191759	0.415698194	0.421687079	Selected
SEEDDIV15331	192057	0.428965383	0.407865795
SEEDDIV15339	192076	0.426582672	0.433114276	Selected
SEEDDIV15276	191719	0.396482297	0.381410296
SEEDDIV15348	192088	0.41353024	0.421363923
SEEDDIV15356	192096	0.424039118	0.43160157	Selected
SEEDDIV15364	150974	0.421154486	0.404874264
SEEDDIV15292	192404	0.412526796	0.422109483	Selected
SEEDDIV15300	191753	0.405591491	0.412643855
SEEDDIV15308	191768	0.402339166	0.380284806
SEEDDIV15316	191758	0.411625027	0.421085926
SEEDDIV15324	191788	0.402357714	0.404897538
SEEDDIV15332	191993	0.438883685	0.443181185
SEEDDIV15340	192079	0.409507276	0.414422522
SEEDDIV15277	191685	0.432523302	0.421038932
SEEDDIV15349	192063	0.421199606	0.426308405
SEEDDIV15357	192097	0.429977025	0.437588995
SEEDDIV15365	150975	0.372618874	0.366986123
SEEDDIV15293	191748	0.414198259	0.41847428
SEEDDIV15301	191754	0.485871844	0.491162166	Selected
SEEDDIV15309	191769	0.479412175	0.481195581	Selected
SEEDDIV15317	191777	0.389090319	0.390293256
SEEDDIV15325	191789	0.368886648	0.368703753
SEEDDIV15333	192059	0.445698647	0.44373383
SEEDDIV15341	192080	0.426719547	0.42635369
SEEDDIV15278	191724	0.426022722	0.41957917
SEEDDIV15350	192090	0.423942254	0.40175431
SEEDDIV15358	192098	0.424154963	0.424984543
SEEDDIV15294	191747	0.414333237	0.419197757
SEEDDIV15302	191755	0.411648689	0.413362446
SEEDDIV15310	191770	0.368113271	0.36504354
SEEDDIV15318	191809	0.430478581	0.437349667
SEEDDIV15334	191994	0.432831137	0.429493662
SEEDDIV15279	191726	0.430042406	0.419540801
SEEDDIV15359	192102	0.430735304	0.427892827
SEEDDIV15287	191734	0.501357458	0.507685438	Selected
SEEDDIV15295	191746	0.410320955	0.413199938
SEEDDIV15303	191756	0.419053316	0.420855928
SEEDDIV15319	191779	0.408266009	0.414719002
SEEDDIV15327	191792	0.367758797	0.375476235
SEEDDIV15335	192061	0.412959087	0.412944396
SEEDDIV15343	192082	0.423394029	0.427408789
SEEDDIV15360	192103	0.432482251	0.432795104
SEEDDIV15288	191736	0.417819178	0.429342744	Selected
SEEDDIV15296	191749	0.434797634	0.425112804
SEEDDIV15312	191797	0.382298103	0.380198737
SEEDDIV15320	191783	0.377372517	0.373823332
SEEDDIV15328	191793	0.369140376	0.358025798
SEEDDIV15336	192073	0.423223916	0.429498775	Selected
SEEDDIV15344	192083	0.397885888	0.402920626
SEEDDIV15281	191729	0.423575277	0.409676896
SEEDDIV15361	192104	0.433004411	0.43426785	Selected
SEEDDIV15289	191739	0.474904006	0.482209469	Selected
SEEDDIV15297	191750	0.41261741	0.421210203	Selected
SEEDDIV15305	191757	0.419217132	0.421004497
SEEDDIV15313	191773	0.394508108	0.401257421
SEEDDIV15321	191784	0.447932503	0.458060462	Selected
SEEDDIV15329	191794	0.388748496	0.390817144
SEEDDIV15345	192084	0.393449859	0.39953182
SEEDDIV15282	191730	0.433209968	0.416514554
SEEDDIV15362	150972	0.379880403	0.379964751
SEEDDIV15290	191740	0.438323283	0.432560952
SEEDDIV15298	191688	0.421912866	0.424049451
SEEDDIV15306	191766	0.414189736	0.419942002
SEEDDIV15314	150994	0.432395752	0.439852054
SEEDDIV15322	191787	1.141923676	1.177363148	Selected
SEEDDIV15330	191760	0.412627695	0.418902875
SEEDDIV15338	192075	0.425970227	0.373364008
SEEDDIV15346	192085	0.415283344	0.422098963
SEEDDIV15441	158584	0.392746222	0.394712257
SEEDDIV15449	158592	0.35415098	0.356540318
SEEDDIV15457	158599	0.396415858	0.408299723	Selected
SEEDDIV15377	150989	0.442672537	0.4432514
SEEDDIV15393	158528	0.370575827	0.347533926
SEEDDIV15401	158536	0.335586663	0.34363148
SEEDDIV15409	158545	0.378198164	0.383239201
SEEDDIV15417	158555	0.36303078	0.368359657
SEEDDIV15425	158114	0.381942252	0.345649945
SEEDDIV15433	158576	0.352776187	0.35320029
SEEDDIV15442	158585	0.396749866	0.363613264
SEEDDIV15450	158593	0.391454648	0.392295382
SEEDDIV15458	158600	0.397457043	0.402346155	Selected
SEEDDIV15378	150988	0.376504956	0.382019229
SEEDDIV15386	150981	0.843162246	0.61304976	Selected
SEEDDIV15402	158537	0.353621742	0.363297534
SEEDDIV15410	158546	0.353508132	0.358769256
SEEDDIV15418	158556	0.361712862	0.366564967
SEEDDIV15426	158115	0.407633942	0.414665417
SEEDDIV15434	158577	0.378067164	0.384326606
SEEDDIV15443	158586	0.391415313	0.385419306
SEEDDIV15451	158566	0.391649222	0.400259563
SEEDDIV15459	158601	0.389567464	0.395629406
SEEDDIV15379	151256	0.384580339	0.382885281
SEEDDIV15395	158529	0.351452371	0.358957194
SEEDDIV15403	158538	0.350674886	0.35740082
SEEDDIV15411	158547	0.337132992	0.338046097
SEEDDIV15419	158113	0.380518365	0.385984522
SEEDDIV15427	158116	0.385721435	0.389028917
SEEDDIV15435	158578	0.358944222	0.35843609
SEEDDIV15372	150997	0.398822693	0.388913633
SEEDDIV15444	158587	0.388916156	0.401664936	Selected
SEEDDIV15452	158594	0.390961787	0.397661293
SEEDDIV15460	158603	0.397751584	0.401385028
SEEDDIV15380	150987	0.381917927	0.378539471
SEEDDIV15388	150980	0.433034777	0.438555249
SEEDDIV15396	158531	0.377319323	0.377373717
SEEDDIV15404	158539	0.365999614	0.370196434
SEEDDIV15412	158548	0.368419038	0.372749598
SEEDDIV15420	158557	0.362658037	0.373349126
SEEDDIV15428	158117	0.411787691	0.416106179
SEEDDIV15436	158579	0.390363429	0.39840031
SEEDDIV15373	150996	0.377111334	0.373167988
SEEDDIV15445	158588	0.391766954	0.40028353
SEEDDIV15453	158595	0.382823917	0.38342459
SEEDDIV15461	158604	0.369366918	0.365231896
SEEDDIV15381	150986	0.378878708	0.387101435
SEEDDIV15389	150979	0.376183733	0.381633842
SEEDDIV15397	158532	0.33625104	0.337251122
SEEDDIV15405	158540	0.347248788	0.355600534
SEEDDIV15413	158550	0.363753721	0.374722268
SEEDDIV15421	158558	0.34782244	0.3560775
SEEDDIV15429	158564	0.387773598	0.38735616
SEEDDIV15437	158581	0.387666243	0.391676966
SEEDDIV15374	150995	0.393173709	0.378725278
SEEDDIV15446	158589	0.384738927	0.382469762
SEEDDIV15454	158596	0.397612389	0.401391761
SEEDDIV15462	158567	0.390695943	0.387667992
SEEDDIV15382	150985	0.439799326	0.447440334	Selected
SEEDDIV15390	150978	0.413539286	0.414655038
SEEDDIV15398	158534	0.349359831	0.347616752
SEEDDIV15406	158541	0.408658178	0.411869918
SEEDDIV15414	158551	0.366866693	0.330300127
SEEDDIV15422	158561	0.359158602	0.362636839
SEEDDIV15430	158573	0.352847913	0.262544894
SEEDDIV15438	158582	0.384493953	0.391847733
SEEDDIV15375	150990	0.448452728	0.417377067
SEEDDIV15447	158590	0.390535138	0.395581657
SEEDDIV15455	158597	0.392817856	0.398499342
SEEDDIV15383	150984	0.382380512	0.391000354
SEEDDIV15399	158111	0.358781911	0.358330039
SEEDDIV15407	158542	0.368068237	0.375331887
SEEDDIV15423	158562	0.371781899	0.357080788
SEEDDIV15431	158574	0.364013827	0.354829295
SEEDDIV15439	158583	0.392312228	0.349806073
SEEDDIV15448	158591	0.397403161	0.346500797
SEEDDIV15456	158598	0.395202369	0.402568581	Selected
SEEDDIV15384	150983	0.372526968	0.382311643
SEEDDIV15392	150993	0.426097308	0.435991927
SEEDDIV15400	158535	0.354893398	0.358157579
SEEDDIV15408	158543	0.350042641	0.358990292
SEEDDIV15416	158554	0.351645789	0.360909823
SEEDDIV15424	158563	0.380916565	0.36332292
SEEDDIV15432	158575	0.376986526	0.383826402
SEEDDIV15440	158565	0.394509376	0.357935362
SEEDDIV15463	157954	0.427304709	0.419230414
SEEDDIV15535	158007	0.441994824	0.449429669	Selected
SEEDDIV15543	158029	0.445251641	0.446155567	Selected
SEEDDIV15551	158037	0.418177246	0.410519462
SEEDDIV15487	157970	0.429598722	0.426270015
SEEDDIV15503	157974	0.433390681	0.430539485	Selected
SEEDDIV15511	157988	0.434739391	0.434009367
SEEDDIV15519	157997	0.479631247	0.42453036
SEEDDIV15527	158021	0.460914376	0.453752346	Selected
SEEDDIV15464	157953	0.512253321	0.462715295	Selected
SEEDDIV15536	158009	0.432080025	0.435789088
SEEDDIV15544	158030	0.425167432	0.428820571	Selected
SEEDDIV15552	158001	0.436698637	0.404788127
SEEDDIV15488	157969	0.450786502	0.425274028
SEEDDIV15496	157962	0.436094611	0.428948462	Selected
SEEDDIV15504	157981	0.406281079	0.403187259
SEEDDIV15512	157989	0.381726244	0.374325808
SEEDDIV15528	158022	0.373610023	0.372433189
SEEDDIV15537	158012	0.452009552	0.447372103
SEEDDIV15545	158031	0.431107696	0.431843201	Selected
SEEDDIV15553	158039	0.43284369	0.424128971
SEEDDIV15473	157940	0.543612119	0.486349678	Selected
SEEDDIV15489	157968	0.45618823	0.446818525	Selected
SEEDDIV15497	157961	0.398097499	0.392590356
SEEDDIV15513	157990	0.435926135	0.4225704	Selected
SEEDDIV15538	158040	0.43415649	0.431546218	Selected
SEEDDIV15546	158032	0.418481895	0.419096607
SEEDDIV15482	157930	0.429316438	0.372454511
SEEDDIV15490	157967	0.443357338	0.43563078	Selected
SEEDDIV15506	157983	0.457432191	0.449857319	Selected
SEEDDIV15530	158025	0.42080843	0.42083152
SEEDDIV15539	158014	0.361937819	0.360733734
SEEDDIV15547	158033	0.423470114	0.42985775	Selected
SEEDDIV15483	157973	0.423032465	0.416691806
SEEDDIV15515	157993	0.378629935	0.377062762
SEEDDIV15523	157952	0.445776038	0.448134024	Selected
SEEDDIV15531	158026	0.422325907	0.391760129
SEEDDIV15540	158015	0.405581125	0.399017112
SEEDDIV15548	158034	0.43217363	0.43103569	Selected
SEEDDIV15508	157984	0.440557874	0.425445709
SEEDDIV15516	157994	0.427177794	0.427026244
SEEDDIV15524	157998	0.399101054	0.400715567
SEEDDIV15532	158027	0.421179777	0.420211937
SEEDDIV15541	158018	0.356159338	0.357323843
SEEDDIV15549	158035	0.360282855	0.35411884
SEEDDIV15485	157972	0.434058184	0.430391393
SEEDDIV15493	157964	0.445694202	0.44318859	Selected
SEEDDIV15509	157986	0.417210705	0.412230217
SEEDDIV15525	158019	0.371080017	0.371303439
SEEDDIV15533	158028	0.380932607	0.373636521
SEEDDIV15542	157999	0.397917696	0.397979114
SEEDDIV15550	158036	0.353769366	0.351398063
SEEDDIV15478	157935	0.427651092	0.411440849
SEEDDIV15486	157971	0.460978762	0.433998117
SEEDDIV15502	157955	0.444492264	0.414741102
SEEDDIV15510	157987	0.531453859	0.392178087
SEEDDIV15518	157996	0.431297869	0.429355977	Selected
SEEDDIV15526	158020	0.374869023	0.36911558
SEEDDIV15534	158043	0.433801006	0.439206871
SEEDDIV941	194609	0.412743982	0.385260013
SEEDDIV1013	194566	0.423360762	0.42849397
SEEDDIV1021	194573	0.407562855	0.413240517
SEEDDIV1029	194580	0.415925108	0.422956394
SEEDDIV949	194617	0.390796918	0.396640771
SEEDDIV957	194514	0.436893863	0.447671855	Selected
SEEDDIV965	194522	0.403375863	0.387222991
SEEDDIV973	194529	0.448367632	0.428077273
SEEDDIV981	194537	0.411936591	0.420081578
SEEDDIV989	194544	0.417795545	0.422273772
SEEDDIV997	194551	0.438689247	0.442339898
SEEDDIV1005	194504	0.446315022	0.457155575	Selected
SEEDDIV942	194509	0.417494302	0.411106551
SEEDDIV1014	194567	0.434749796	0.445368074
SEEDDIV1022	194574	0.416386913	0.424919037
SEEDDIV1030	194581	0.434856871	0.443855349
SEEDDIV950	194618	0.39170792	0.399498736
SEEDDIV958	194515	0.422514113	0.424276093
SEEDDIV966	194523	0.452794743	0.456892645	Selected
SEEDDIV974	194530	0.444323555	0.452264072	Selected
SEEDDIV982	194538	0.436247156	0.447002948	Selected
SEEDDIV990	194545	0.421647527	0.425865006
SEEDDIV998	194552	0.430903526	0.442388259	Selected
SEEDDIV1006	194559	0.419352016	0.424151064
SEEDDIV943	194611	0.453902744	0.446565129
SEEDDIV1015	194568	0.441406835	0.448319693	Selected
SEEDDIV1023	194575	0.406724665	0.410537679
SEEDDIV1031	194583	0.415396706	0.422479047
SEEDDIV951	194619	0.456839564	0.466753498	Selected
SEEDDIV959	194516	0.423800926	0.429207969
SEEDDIV967	194524	0.433484955	0.431477175
SEEDDIV975	194531	0.39595621	0.396432242
SEEDDIV983	194502	0.42343143	0.433411519
SEEDDIV991	194546	0.441708521	0.446747286	Selected
SEEDDIV999	194553	0.414788631	0.423849099
SEEDDIV1007	194560	0.432436819	0.441645012
SEEDDIV944	194612	0.416142575	0.413320068
SEEDDIV1016	194505	0.425339395	0.4297124
SEEDDIV1024	194576	0.423153347	0.431789346
SEEDDIV1032	194584	0.433931549	0.443911355
SEEDDIV952	194620	0.450582198	0.457251692	Selected
SEEDDIV960	194517	0.418936639	0.429425648
SEEDDIV968	194525	0.440132662	0.444698355	Selected
SEEDDIV976	194532	0.398283299	0.407191124
SEEDDIV984	194539	0.41078218	0.417318122
SEEDDIV992	194547	0.438720865	0.438841452
SEEDDIV1000	194554	0.434483517	0.441386617
SEEDDIV1008	194561	0.433371584	0.442790348
SEEDDIV945	194613	0.400972773	0.391210942
SEEDDIV1017	194569	0.408285535	0.417102388
SEEDDIV1025	194577	0.443618839	0.452376905	Selected
SEEDDIV1033	194585	0.416912328	0.423788638
SEEDDIV953	194510	0.434287455	0.439068439
SEEDDIV961	194500	0.429928916	0.437889508
SEEDDIV969	194526	0.434915932	0.438284523
SEEDDIV977	194533	0.398054455	0.401279353
SEEDDIV985	194540	0.435164646	0.443221899
SEEDDIV993	194548	0.409871512	0.416677991
SEEDDIV1001	194555	0.426195718	0.430743682
SEEDDIV1009	194562	0.439476013	0.445124813
SEEDDIV946	194614	0.412963697	0.408348112
SEEDDIV1018	194570	0.425101546	0.433577497
SEEDDIV1026	194578	0.455420742	0.454367719	Selected
SEEDDIV1034	194586	0.433173755	0.439229296
SEEDDIV954	194511	0.412936463	0.417098978
SEEDDIV962	194519	0.395686525	0.408572885
SEEDDIV970	194527	0.435034574	0.435739439
SEEDDIV978	194534	0.443880926	0.446287771	Selected
SEEDDIV986	194541	0.402333876	0.412782202
SEEDDIV994	194503	0.433806464	0.445223162	Selected
SEEDDIV1002	194556	0.404720003	0.414357438
SEEDDIV1010	194563	0.409182026	0.414176091
SEEDDIV947	194615	0.416191109	0.407043512
SEEDDIV1019	194571	0.415505034	0.425645912
SEEDDIV1027	194506	0.416611823	0.42629681
SEEDDIV955	194512	0.403195794	0.406759426
SEEDDIV963	194520	0.394497784	0.403329017
SEEDDIV971	194528	0.44939619	0.453675252	Selected
SEEDDIV979	194535	0.396806545	0.3998199
SEEDDIV987	194542	0.434886994	0.419013529
SEEDDIV995	194549	0.426285565	0.434217642
SEEDDIV1003	194557	0.442070922	0.452680963	Selected
SEEDDIV1011	194564	0.417833679	0.423382254
SEEDDIV948	194616	0.427821077	0.420927691
SEEDDIV1020	194572	0.405918355	0.414739234
SEEDDIV1028	194579	0.43371333	0.443110992
SEEDDIV956	194513	0.419458872	0.428340183
SEEDDIV964	194521	0.443438256	0.446690265	Selected
SEEDDIV972	194501	0.419631667	0.423131602
SEEDDIV980	194536	0.40499042	0.412228251
SEEDDIV988	194543	0.419112593	0.423160221
SEEDDIV996	194550	0.434358887	0.44646023	Selected
SEEDDIV1004	194558	0.406579348	0.414802147
SEEDDIV1012	194565	0.422579066	0.43212872
SEEDDIV15554	192106	0.42735956	0.408487133
SEEDDIV15626	221786	0.35465703	0.363290046
SEEDDIV15634	221803	0.375458838	0.384826374
SEEDDIV15642	221813	0.379950542	0.384158429
SEEDDIV15570	192130	0.425692928	0.426907536
SEEDDIV15586	192156	0.36230049	0.367139401
SEEDDIV15594	192160	0.355214755	0.363370597
SEEDDIV15602	192175	0.397552628	0.25269247
SEEDDIV15610	221777	0.369190324	0.373804963
SEEDDIV15618	221767	0.31842529	0.322993415
SEEDDIV15555	192107	0.421559919	0.411773064
SEEDDIV15627	221788	0.37320078	0.379099766
SEEDDIV15635	221804	0.378394944	0.386511009
SEEDDIV15643	221794	0.374062647	0.383770981
SEEDDIV15563	192121	0.44265825	0.448981491	Selected
SEEDDIV15571	192140	0.425103967	0.4306336
SEEDDIV15579	192149	0.430549714	0.41524785
SEEDDIV15595	192161	0.35519284	0.357547819
SEEDDIV15603	192132	0.524431493	0.520112141	Selected
SEEDDIV15611	221776	0.369719293	0.382019554
SEEDDIV15619	221766	0.38533871	0.389842293
SEEDDIV15556	192109	0.440291192	0.429216804
SEEDDIV15628	221789	0.360116032	0.362250185
SEEDDIV15636	221805	0.385547035	0.391743615
SEEDDIV15644	221815	0.378006238	0.385968217
SEEDDIV15564	192122	0.420375777	0.425658426
SEEDDIV15572	192137	0.389518437	0.397323358
SEEDDIV15588	192184	0.512321145	0.425175464
SEEDDIV15596	192166	0.381955217	0.382211456
SEEDDIV15604	221783	0.360146491	0.3630811
SEEDDIV15612	221774	0.368146661	0.376181235
SEEDDIV15620	221773	0.368263866	0.366902263
SEEDDIV15557	192110	0.415651169	0.406631349
SEEDDIV15629	221790	0.376548046	0.381735144
SEEDDIV15637	221809	0.37876934	0.386544824
SEEDDIV15645	221814	0.377094536	0.381592021
SEEDDIV15565	192123	0.418952993	0.422869989
SEEDDIV15573	192128	0.406327037	0.383583435
SEEDDIV15581	192151	0.474379038	0.282149611
SEEDDIV15605	221782	0.366863805	0.375047281
SEEDDIV15613	221772	0.367758432	0.379161555
SEEDDIV15621	221765	0.377283168	0.385547663
SEEDDIV15558	192111	0.426717678	0.416946951
SEEDDIV15630	221791	0.358402746	0.368404323
SEEDDIV15646	221816	0.411585134	0.408038116
SEEDDIV15574	192142	0.422985944	0.430893548	Selected
SEEDDIV15582	192152	0.430791913	0.413111753
SEEDDIV15590	192182	0.353512568	0.356638531
SEEDDIV15606	221781	0.370880463	0.375389685
SEEDDIV15614	221771	0.368437931	0.376635277
SEEDDIV15622	221764	0.369369574	0.373718465
SEEDDIV15559	192113	0.411293357	0.399339201
SEEDDIV15639	221810	0.380373782	0.380063992
SEEDDIV15647	192157	0.383119463	0.381092575
SEEDDIV15567	192125	0.444882806	0.433050359
SEEDDIV15583	192153	0.429174815	0.436441924
SEEDDIV15591	192183	0.386709547	0.324930867
SEEDDIV15599	192172	0.377787686	0.378603393
SEEDDIV15607	221780	0.368669375	0.378752337
SEEDDIV15615	221770	0.371336982	0.380517345
SEEDDIV15623	221763	0.381172117	0.388304496
SEEDDIV15560	192115	0.423778707	0.408526362
SEEDDIV15632	221793	0.444852312	0.448311859
SEEDDIV15640	221811	0.376622739	0.384248819
SEEDDIV15568	192067	0.429440164	0.436007339
SEEDDIV15576	192145	0.429673541	0.436428139
SEEDDIV15584	192154	0.381159358	0.384658951
SEEDDIV15592	192158	0.355999248	0.359986994
SEEDDIV15600	192173	0.36554522	0.366921553
SEEDDIV15608	221779	0.377827417	0.344843272
SEEDDIV15616	221769	0.367496312	0.378462408
SEEDDIV15624	221784	0.381280209	0.383644744
SEEDDIV15561	192116	0.43276169	0.412975161
SEEDDIV15633	221802	0.383047677	0.38173097
SEEDDIV15641	221812	0.37529554	0.38310913
SEEDDIV15569	192069	0.431350184	0.431619848	Selected
SEEDDIV15577	192146	0.419206967	0.417410102
SEEDDIV15585	192155	0.410528073	0.407680804
SEEDDIV15593	192159	0.362571684	0.367871401
SEEDDIV15601	192176	0.383038742	0.387904426
SEEDDIV15609	221778	0.371556988	0.377070006
SEEDDIV15617	221768	0.370191664	0.378869965
SEEDDIV15625	221787	0.383659327	0.392350576
SEEDDIV15648	221850	0.39146932	0.388277699
SEEDDIV15720	221842	0.379047348	0.385448368
SEEDDIV15728	221851	0.383501271	0.388466895
SEEDDIV15736	221926	0.380806633	0.386326063
SEEDDIV15656	221949	0.361699188	0.36572432
SEEDDIV15664	221958	0.361887631	0.370481857
SEEDDIV15672	221965	0.387674469	0.380421897
SEEDDIV15680	221924	0.386734163	0.387235358
SEEDDIV15688	223715	0.40069227	0.405493719
SEEDDIV15696	221818	0.369608341	0.376637137
SEEDDIV15704	221825	0.379019059	0.384595885
SEEDDIV15712	221834	0.382205189	0.390873368
SEEDDIV15649	221943	0.38756874	0.378709227
SEEDDIV15721	221843	0.374924477	0.378362558
SEEDDIV15729	221852	0.373998577	0.377132977
SEEDDIV15737	221927	0.380647603	0.384881089
SEEDDIV15657	221950	0.384483672	0.388405222
SEEDDIV15665	221920	0.388367454	0.394022196
SEEDDIV15673	221966	0.378924369	0.385444143
SEEDDIV15681	221925	0.402117247	0.408736878
SEEDDIV15689	223716	0.383164775	0.395001377
SEEDDIV15697	221819	0.382071625	0.381088145
SEEDDIV15705	221826	0.380515908	0.38729171
SEEDDIV15713	221796	0.380238936	0.388979744
SEEDDIV15650	221944	0.388378797	0.372324131
SEEDDIV15722	221844	0.378028932	0.385755294
SEEDDIV15730	221853	0.368955063	0.377171885
SEEDDIV15738	221928	0.38191853	0.382570049
SEEDDIV15658	221952	0.383517803	0.386008626
SEEDDIV15666	221959	0.399425769	0.406651334
SEEDDIV15674	221967	0.37702601	0.384427524
SEEDDIV15682	221557	0.432935895	0.441885699
SEEDDIV15690	223718	0.414295095	0.42838625
SEEDDIV15698	221820	0.374456324	0.380413093
SEEDDIV15706	221827	0.377698799	0.385814803
SEEDDIV15714	221835	0.380639813	0.389325195
SEEDDIV15651	221945	0.372676231	0.357071752
SEEDDIV15723	221845	0.375689548	0.382258519
SEEDDIV15731	221798	0.384171957	0.38976368
SEEDDIV15739	221929	0.392960844	0.398035442
SEEDDIV15659	221953	0.376739799	0.373859481
SEEDDIV15667	221960	0.385590169	0.387162506
SEEDDIV15675	221921	0.363283687	0.364047203
SEEDDIV15683	221593	0.417793492	0.411467405
SEEDDIV15691	223720	0.357317235	0.359830536
SEEDDIV15699	221821	0.377841237	0.363112597
SEEDDIV15707	221829	0.380588298	0.389296286
SEEDDIV15715	221836	0.371433662	0.379195261
SEEDDIV15652	221946	0.443405568	0.434207013
SEEDDIV15724	221797	0.378240041	0.382945106
SEEDDIV15732	221799	0.384006842	0.384595579
SEEDDIV15660	221954	0.391708952	0.396292989
SEEDDIV15668	221961	0.40012793	0.406318542
SEEDDIV15684	223714	0.378904294	0.366486125
SEEDDIV15692	223721	0.357308266	0.364926058
SEEDDIV15700	221822	0.374080595	0.382685818
SEEDDIV15708	221830	0.383486251	0.387236571
SEEDDIV15716	221837	0.379376114	0.382568705
SEEDDIV15653	221947	0.390321165	0.381032081
SEEDDIV15725	221846	0.375967278	0.38437831
SEEDDIV15733	221800	0.380037005	0.387139588
SEEDDIV15741	221931	0.386173251	0.382722845
SEEDDIV15661	221955	0.379734193	0.37981567
SEEDDIV15669	221962	0.389433733	0.392382372
SEEDDIV15677	221922	0.374423142	0.371750894
SEEDDIV15685	221661	0.433663485	0.43336979
SEEDDIV15693	223723	0.424392085	0.430487435
SEEDDIV15701	221823	0.378265529	0.386625085
SEEDDIV15709	221831	0.377133497	0.385145391
SEEDDIV15717	221839	0.379287388	0.38190613
SEEDDIV15654	221919	0.394068425	0.386670059
SEEDDIV15726	221848	0.37914983	0.384478923
SEEDDIV15734	221801	0.379347812	0.385640413
SEEDDIV15670	221963	0.37583109	0.381261611
SEEDDIV15678	221546	0.399670441	0.404726154
SEEDDIV15686	221662	0.394646273	0.394650166
SEEDDIV15702	221795	0.395406259	0.397989684
SEEDDIV15710	221832	0.382482804	0.388666554
SEEDDIV15718	221840	0.377821356	0.384802079
SEEDDIV15655	221948	0.369555017	0.362155798
SEEDDIV15727	221849	0.347854089	0.352006259
SEEDDIV15735	221942	0.357283679	0.364279398
SEEDDIV15671	221964	0.379548734	0.386364864
SEEDDIV15679	221923	0.358935805	0.356842727
SEEDDIV15687	223713	0.355384188	0.359963026
SEEDDIV15703	221824	0.37226013	0.374610024
SEEDDIV15711	221833	0.377405113	0.385992933
SEEDDIV15719	221841	0.377603785	0.38485682
SEEDDIV15742	162384	0.426197688	0.430357565	Selected
SEEDDIV15750	162373	0.379069562	0.383147923
SEEDDIV15758	162401	0.398438249	0.401266263
SEEDDIV15766	157736	0.456867881	0.397023264
SEEDDIV15774	157714	0.36491337	0.368445383
SEEDDIV15782	157868	0.387317791	0.39474674
SEEDDIV15743	162385	0.407942707	0.412826391
SEEDDIV15751	162392	0.395295714	0.388581401
SEEDDIV15759	162374	0.395914168	0.398842624
SEEDDIV15767	157738	0.412548828	0.374565277
SEEDDIV15775	157746	0.389085284	0.291464684
SEEDDIV15783	157869	0.395522632	0.399841039
SEEDDIV15744	162386	0.423475795	0.434271171	Selected
SEEDDIV15752	162393	0.395653267	0.389215755
SEEDDIV15760	162405	0.37368902	0.380593059
SEEDDIV15768	157739	0.405987242	0.39326019
SEEDDIV15776	157747	0.415456658	0.412398325
SEEDDIV15784	157870	0.380128544	0.381024273
SEEDDIV15745	162387	0.423559054	0.426969815
SEEDDIV15753	162395	0.390389732	0.231035912
SEEDDIV15761	157705	0.394547298	0.390951382
SEEDDIV15777	157748	0.40232325	0.397891884
SEEDDIV15785	157871	0.425369883	0.429945384
SEEDDIV15809	157858	0.419327615	0.42538081	Selected
SEEDDIV15746	162388	0.418266625	0.424493881
SEEDDIV15754	162396	0.376122131	0.371330336
SEEDDIV15770	157741	0.390687225	0.366819721
SEEDDIV15778	157750	0.414989157	0.397617803
SEEDDIV15786	157872	0.382387117	0.387402993
SEEDDIV15747	162389	0.38970342	0.37927787
SEEDDIV15835	157916	0.439265608	0.445568556	Selected
SEEDDIV15755	162398	0.423734571	0.431109798
SEEDDIV15763	158063	0.403166434	0.386528596
SEEDDIV15771	157743	0.40603622	0.398205024
SEEDDIV15779	157751	0.43376552	0.367633317
SEEDDIV15748	162390	0.426077461	0.412039751
SEEDDIV15828	157922	0.492684557	0.432652143
SEEDDIV15756	162399	0.408165599	0.412366471
SEEDDIV15764	157713	0.395299459	0.398551607
SEEDDIV15772	157744	0.401415116	0.389126035
SEEDDIV15780	157752	0.405129468	0.406598921
SEEDDIV15788	157874	0.42787672	0.433368017	Selected
SEEDDIV15749	162391	0.407130556	0.396869419
SEEDDIV15829	157921	0.437640544	0.443043338
SEEDDIV15757	162400	0.390746345	0.381317421
SEEDDIV15765	157735	0.406095734	0.413271335
SEEDDIV15781	157753	0.35941501	0.352103881
SEEDDIV15789	157853	0.434289844	0.438020489	Selected
SEEDDIV15930	2249829	0.405135694	0.377703348
SEEDDIV16002	2249831	0.373514324	0.377554062
SEEDDIV16010	2249815	0.415642202	0.423191451	Selected
SEEDDIV16018	2249808	0.428495471	0.432210004	Selected
SEEDDIV15938	2249795	0.387651146	0.389592114
SEEDDIV15946	2249824	0.38869178	0.3958672
SEEDDIV15970	2249763	0.426578225	0.428912116	Selected
SEEDDIV15978	2249755	0.39072272	0.392981157
SEEDDIV15986	2249783	0.393570931	0.390171527
SEEDDIV15994	2249734	0.407942396	0.414038086
SEEDDIV15931	2249802	0.397767159	0.383315027
SEEDDIV16003	2249822	0.391682472	0.393753799
SEEDDIV16011	2249814	0.438425991	0.447724698	Selected
SEEDDIV16019	2249807	0.394425704	0.39257724
SEEDDIV15939	2249794	0.407659533	0.414580076
SEEDDIV15947	2249823	0.442175239	0.451383574	Selected
SEEDDIV15963	2249769	0.410974879	0.416827835
SEEDDIV15971	2249762	0.386029304	0.386100451
SEEDDIV15979	2249754	0.390840685	0.398738879
SEEDDIV15987	2249751	0.386233678	0.382264343
SEEDDIV15995	2249733	0.394226486	0.398244488
SEEDDIV15932	2249801	0.427860996	0.42126631	Selected
SEEDDIV16004	2249821	0.426969145	0.42764317	Selected
SEEDDIV16012	2249813	0.419491043	0.419307508	Selected
SEEDDIV16020	2249806	0.411850055	0.421505573	Selected
SEEDDIV15940	2249793	0.476134633	0.482960733	Selected
SEEDDIV15948	2249791	0.384846941	0.384325321
SEEDDIV15956	2249775	0.41388525	0.373217633
SEEDDIV15964	2249768	0.411054901	0.414789808
SEEDDIV15972	2249761	0.496079416	0.488127763	Selected
SEEDDIV15980	2249753	0.38741324	0.394344502
SEEDDIV15988	2249742	0.497538335	0.505486069	Selected
SEEDDIV15996	2249750	0.384781691	0.387935607
SEEDDIV15933	2249800	0.396080033	0.380710214
SEEDDIV16005	2249820	0.409178025	0.412850562
SEEDDIV16013	2249830	0.370761094	0.375152938
SEEDDIV16021	2249805	0.472808447	0.432383341
SEEDDIV15941	2249828	0.496049098	0.504575592	Selected
SEEDDIV15949	2249782	0.423153201	0.391091289
SEEDDIV15957	2249774	0.404507759	0.411866062
SEEDDIV15965	2249767	0.392516779	0.397595173
SEEDDIV15981	2249788	0.386477966	0.38336525
SEEDDIV15989	2249741	0.403639757	0.398283936
SEEDDIV15997	2249732	0.402055184	0.411023659
SEEDDIV15934	2249799	0.386633253	0.379169946
SEEDDIV16006	2249819	0.439417342	0.40980197
SEEDDIV16014	2249812	0.367785738	0.37765355
SEEDDIV16022	2249804	0.459851974	0.458475267
SEEDDIV15942	2249792	0.423444617	0.427459309
SEEDDIV15950	2249781	0.414091708	0.417949064	Selected
SEEDDIV15958	2249773	0.405128081	0.415400224
SEEDDIV15966	2249766	0.394709709	0.397472826
SEEDDIV15974	2249759	0.406612926	0.411891058
SEEDDIV15982	2249752	0.401352849	0.408013007
SEEDDIV15990	2249739	0.388870784	0.391115479
SEEDDIV15998	2249731	0.410578437	0.413464199
SEEDDIV15935	2249798	0.399538144	0.364972491
SEEDDIV16007	2249818	0.445897775	0.453468174	Selected
SEEDDIV16015	2249811	0.42698871	0.431561807	Selected
SEEDDIV15943	2249827	0.495916152	0.503327699	Selected
SEEDDIV15951	2249780	0.405524925	0.416474497
SEEDDIV15959	2249790	0.39540579	0.396683518
SEEDDIV15975	2249758	0.389725053	0.389466043
SEEDDIV15983	2249787	0.399598572	0.405476877
SEEDDIV15991	2249738	0.421833177	0.305979472
SEEDDIV15999	2249730	0.429494162	0.423820303	Selected
SEEDDIV15936	2249797	0.401220518	0.38695047
SEEDDIV16008	2249817	0.378486513	0.385922178
SEEDDIV16016	2249810	0.438413597	0.438981597	Selected
SEEDDIV15944	2249826	0.490690206	0.489007459	Selected
SEEDDIV15952	2249779	0.412112034	0.416027203
SEEDDIV15960	2249772	0.437733906	0.435318455	Selected
SEEDDIV15968	2249765	0.437645469	0.434159444	Selected
SEEDDIV15976	2249757	0.392200542	0.399030686
SEEDDIV15984	2249786	0.393720365	0.382950553
SEEDDIV15992	2249737	0.407300157	0.409527306
SEEDDIV15937	2249796	0.390301367	0.37965536
SEEDDIV16009	2249816	0.393803409	0.398412645
SEEDDIV16017	2249809	0.405864864	0.402411266
SEEDDIV15945	2249825	0.398375419	0.401566894
SEEDDIV15953	2249778	0.397296666	0.395072761
SEEDDIV15961	2249771	0.437168768	0.437002084	Selected
SEEDDIV15969	2249764	0.389274548	0.392152965
SEEDDIV15977	2249756	0.410455293	0.4147266
SEEDDIV15985	2249785	0.385695388	0.383404399
SEEDDIV15993	2249736	0.401104295	0.407718105
SEEDDIV16024	223777	0.40653768	0.395261839
SEEDDIV16096	223761	1.160913931	1.201083247	Selected
SEEDDIV16104	223768	0.433246929	0.438882967
SEEDDIV16112	223774	0.397467579	0.404159554
SEEDDIV16040	225587	0.429099829	0.354776666
SEEDDIV16072	223730	0.402727783	0.410201513
SEEDDIV16080	223746	0.428124593	0.434475142
SEEDDIV16088	223753	0.448638839	0.458712448	Selected
SEEDDIV16025	223778	0.4792609	0.458449573
SEEDDIV16097	223734	0.432167566	0.438811462
SEEDDIV16105	223769	0.429824041	0.439950304
SEEDDIV16113	223775	0.424432901	0.423657562
SEEDDIV16041	225588	0.43867248	0.444582097
SEEDDIV16073	223731	0.407979398	0.418859394
SEEDDIV16081	223747	0.423343223	0.434712131
SEEDDIV16026	223779	0.487245794	0.481967947	Selected
SEEDDIV16098	223762	0.429427142	0.434639214
SEEDDIV16106	223770	0.473564571	0.484465802	Selected
SEEDDIV16114	223776	0.449145992	0.376121549
SEEDDIV16034	225582	0.427824107	0.434750319
SEEDDIV16042	225590	0.429356598	0.434847854	Selected
SEEDDIV16074	221656	0.364845009	0.373383487
SEEDDIV16082	223748	0.471971796	0.481945026	Selected
SEEDDIV16090	223755	0.371068614	0.378442922
SEEDDIV16027	223780	0.480551886	0.480708126	Selected
SEEDDIV16099	223763	0.477550148	0.484908083	Selected
SEEDDIV16107	223771	0.401528177	0.407160494
SEEDDIV16043	225591	0.430917749	0.435484597
SEEDDIV16075	223732	0.391321876	0.402159555
SEEDDIV16083	223749	0.412875835	0.421949441
SEEDDIV16091	223756	0.411426857	0.420235478
SEEDDIV16028	223781	0.482923248	0.482484875	Selected
SEEDDIV16100	223764	0.462943423	0.475428678	Selected
SEEDDIV16036	225584	0.513752082	0.520644507	Selected
SEEDDIV16044	225595	0.424887211	0.427113198
SEEDDIV16084	223750	0.422618458	0.431310193
SEEDDIV16092	223757	0.422864747	0.424223646	Selected
SEEDDIV16029	223737	0.457530268	0.451702123
SEEDDIV16101	223765	0.41728576	0.425732873
SEEDDIV16109	223736	0.479341788	0.486897646	Selected
SEEDDIV16037	225585	0.417021457	0.430330421
SEEDDIV16045	225596	0.435280251	0.439508471	Selected
SEEDDIV16085	223751	0.43958001	0.445239059
SEEDDIV16093	223758	0.473595564	0.469491469
SEEDDIV16030	223782	0.42668697	0.422801246
SEEDDIV16102	223766	0.428308415	0.430511001
SEEDDIV16110	223772	0.431576588	0.439391373
SEEDDIV16038	225586	0.414219203	0.423073513
SEEDDIV16078	223744	0.422970805	0.432129543
SEEDDIV16086	223733	0.438408629	0.449373221
SEEDDIV16094	223759	0.474682159	0.489096831	Selected
SEEDDIV16031	225575	0.43629348	0.432482244
SEEDDIV16103	223767	0.470453622	0.480739695	Selected
SEEDDIV16111	223773	0.42585197	0.429612483
SEEDDIV16039	225541	0.412818262	0.425265562
SEEDDIV16079	223745	0.423116669	0.430051164
SEEDDIV16087	223752	0.360503085	0.371596621
SEEDDIV16095	223760	0.401593831	0.409159547
SEEDDIV16186	225666	0.228447245	0.230496897
SEEDDIV16194	225675	0.390362111	0.394745531
SEEDDIV16202	225684	0.30924308	0.306122246
SEEDDIV16138	225542	0.346551717	0.344691067
SEEDDIV16146	225607	0.383254792	0.388228075
SEEDDIV16154	225674	0.401868856	0.406077861
SEEDDIV16162	225635	0.355325499	0.337303553
SEEDDIV16187	225667	0.37257902	0.371583116
SEEDDIV16195	225676	0.427972076	0.435802204	Selected
SEEDDIV16203	225686	0.401447964	0.405441699
SEEDDIV16147	225608	0.408062184	0.416971393
SEEDDIV16163	225636	0.44246506	0.443683564
SEEDDIV16196	225677	0.353631139	0.361108046
SEEDDIV16204	225687	0.388742781	0.394422744
SEEDDIV16140	225602	0.400595142	0.404788198
SEEDDIV16148	225609	0.408875928	0.404210571
SEEDDIV16156	225629	0.431015406	0.430715844
SEEDDIV16189	225668	0.438959649	0.444073795	Selected
SEEDDIV16197	225679	0.378133238	0.374791063
SEEDDIV16205	225689	0.354113904	0.350639753
SEEDDIV16141	225603	0.448737173	0.452525945	Selected
SEEDDIV16149	225611	0.408078066	0.394550363
SEEDDIV16190	225670	0.398443047	0.400901948
SEEDDIV16198	225680	0.430743342	0.429119612
SEEDDIV16206	225691	0.371502317	0.376331701
SEEDDIV16142	225604	0.473272322	0.469932144	Selected
SEEDDIV16150	225615	0.453211094	0.461783838	Selected
SEEDDIV16158	225631	0.357638941	0.361495196
SEEDDIV16174	225651	0.445325251	0.451921547
SEEDDIV16182	225658	0.462379937	0.426234298
SEEDDIV16191	225672	0.332029779	0.338270971
SEEDDIV16199	225624	0.428069359	0.428562586
SEEDDIV16207	225625	0.476940801	0.485119321	Selected
SEEDDIV16143	225605	0.426996884	0.426019906
SEEDDIV16151	225616	0.425180355	0.425849251
SEEDDIV16159	225632	0.438193545	0.448049526	Selected
SEEDDIV16167	225640	0.347673653	0.353783913
SEEDDIV16192	225673	0.407467371	0.40723338
SEEDDIV16200	225682	0.435611066	0.445129624	Selected
SEEDDIV16144	225606	0.453137913	0.455209144	Selected
SEEDDIV16152	225618	0.427115976	0.429667561
SEEDDIV16160	225633	0.430575646	0.429864626
SEEDDIV16168	225641	0.429576182	0.427909859
SEEDDIV16201	225683	0.396004893	0.390524979
SEEDDIV16145	225543	0.418095401	0.409303972
SEEDDIV16153	225545	0.421237329	0.427906776
SEEDDIV16161	225634	0.422752409	0.387982606
SEEDDIV16169	225645	0.437911357	0.442272292	Selected
SEEDDIV16177	225654	0.44412754	0.44492721	Selected
SEEDDIV16279	162058	0.420714141	0.416620083
SEEDDIV16287	162065	0.404409822	0.404585937
SEEDDIV16295	162033	0.40149362	0.405726269
SEEDDIV16216	157669	0.40176147	0.398200384
SEEDDIV16224	157697	0.383696351	0.385392946
SEEDDIV16232	162004	0.429146079	0.412796072
SEEDDIV16240	162017	0.410653635	0.418380457
SEEDDIV16248	162027	0.410364569	0.398900838
SEEDDIV16256	162044	0.403697395	0.407156211
SEEDDIV16264	162054	0.428081046	0.392135444
SEEDDIV16272	162084	0.349343926	0.352245777
SEEDDIV16280	162059	0.395334278	0.395574487
SEEDDIV16288	162068	0.401613747	0.405496179
SEEDDIV16296	162034	0.400606727	0.391478834
SEEDDIV16225	157670	0.450107354	0.447447817	Selected
SEEDDIV16233	157671	0.451383817	0.452701749	Selected
SEEDDIV16241	162018	0.417351191	0.41988983
SEEDDIV16249	157674	0.462019249	0.426185987
SEEDDIV16257	162045	0.436524651	0.443649149	Selected
SEEDDIV16265	162055	0.422923663	0.432524443	Selected
SEEDDIV16281	162060	0.387203799	0.389416668
SEEDDIV16289	162069	0.42129685	0.430375947	Selected
SEEDDIV16297	162086	0.425554386	0.426605627	Selected
SEEDDIV16226	157698	0.373652079	0.378967606
SEEDDIV16234	162006	0.419911812	0.425144351
SEEDDIV16242	162022	0.417147864	0.416747887
SEEDDIV16258	162046	0.410557796	0.418815215
SEEDDIV16266	162056	0.440721457	0.439606163	Selected
SEEDDIV16273	162032	0.396219033	0.399543121
SEEDDIV16211	157682	0.376884024	0.375208164
SEEDDIV16282	162030	0.403340897	0.404824815
SEEDDIV16290	162066	0.379108373	0.374186007
SEEDDIV16298	162088	0.401476697	0.405901673
SEEDDIV16219	157691	0.406545075	0.410122194
SEEDDIV16227	157700	0.381231309	0.359348348
SEEDDIV16235	162013	0.363299843	0.363714485
SEEDDIV16243	162023	0.415346494	0.418128534
SEEDDIV16259	162048	0.401441197	0.403548255
SEEDDIV16267	162078	0.436863782	0.442528571	Selected
SEEDDIV16274	162085	0.369905538	0.375861226
SEEDDIV16283	162061	0.38619054	0.394300438
SEEDDIV16291	162070	0.368213406	0.370515642
SEEDDIV16299	162035	0.396188254	0.395703551
SEEDDIV16220	157692	0.384696967	0.383610269
SEEDDIV16228	157701	0.388205795	0.39021259
SEEDDIV16236	162014	0.382501984	0.387982168
SEEDDIV16244	162024	0.401806186	0.408473222
SEEDDIV16252	162028	0.409643886	0.396958709
SEEDDIV16260	162050	0.426432035	0.432773002
SEEDDIV16268	162079	0.365835881	0.367308447
SEEDDIV16275	162089	0.411851631	0.416043183
SEEDDIV16213	157684	0.402009625	0.40467406
SEEDDIV16284	162062	0.42427451	0.43258143	Selected
SEEDDIV16292	162092	0.412854036	0.416143662
SEEDDIV16221	157693	0.402299153	0.408610226
SEEDDIV16229	162002	0.42816121	0.426146383
SEEDDIV16237	162015	0.393634278	0.398504154
SEEDDIV16245	162025	0.388146796	0.393450804
SEEDDIV16253	162037	0.431296726	0.425054432
SEEDDIV16261	162051	0.406737531	0.406148452
SEEDDIV16269	162080	0.408227259	0.408442707
SEEDDIV16285	162063	0.390416723	0.39514134
SEEDDIV16293	162093	0.443632889	0.444708577	Selected
SEEDDIV16222	157695	0.408816549	0.413287497
SEEDDIV16230	162003	0.487988009	0.493818528	Selected
SEEDDIV16238	157672	0.456872485	0.45295718	Selected
SEEDDIV16246	162026	0.407269653	0.406337953
SEEDDIV16254	162040	0.412734549	0.394725995
SEEDDIV16262	162052	0.402606498	0.405716583
SEEDDIV16270	162081	0.376584674	0.375938364
SEEDDIV16277	162091	0.450332302	0.455713737	Selected
SEEDDIV16286	162064	0.414365567	0.400551056
SEEDDIV16294	162094	0.435200586	0.435750346	Selected
SEEDDIV16223	157696	0.408743192	0.400359185
SEEDDIV16231	157694	0.357594875	0.363684774
SEEDDIV16239	162016	0.420027323	0.416338372
SEEDDIV16247	157673	0.451776749	0.45716567	Selected
SEEDDIV16263	162053	0.393484703	0.402019813
SEEDDIV16271	162083	0.419880663	0.426825546
SEEDDIV16278	162057	0.370263313	0.372317065
SEEDDIV16301	162221	0.387052953	0.390626172
SEEDDIV16372	158833	0.389346041	0.394056828
SEEDDIV16380	158840	0.385776273	0.395981093
SEEDDIV16388	158848	0.372980044	0.373934941
SEEDDIV16325	158108	0.394346057	0.389136851
SEEDDIV16333	158119	0.357881748	0.367591215
SEEDDIV16341	158110	0.354363176	0.331883964
SEEDDIV16349	221934	0.370545908	0.375334585
SEEDDIV16356	158048	0.382594185	0.367294889
SEEDDIV16302	162224	0.371486606	0.37313164
SEEDDIV16373	158834	0.376108671	0.381360457
SEEDDIV16381	158839	0.386924569	0.395513465
SEEDDIV16389	158842	0.394955684	0.37994361
SEEDDIV16326	157574	0.39725543	0.394250475
SEEDDIV16334	158120	0.351416345	0.35733277
SEEDDIV16350	221935	0.363802508	0.366865978
SEEDDIV16357	158049	0.388709504	0.399585675
SEEDDIV16374	158836	0.348678132	0.35430328
SEEDDIV16327	157575	0.381839126	0.382176108
SEEDDIV16335	158121	0.37816742	0.385397954
SEEDDIV16343	158522	0.42586228	0.430236851	Selected
SEEDDIV16351	221917	0.387759373	0.388381823
SEEDDIV16358	158050	0.448958633	0.451747909
SEEDDIV16375	158843	0.391125811	0.394067349
SEEDDIV16383	158845	0.373268369	0.375257664
SEEDDIV16328	157576	0.371766396	0.37838225
SEEDDIV16336	158123	0.417529622	0.426080735	Selected
SEEDDIV16344	158524	0.348609399	0.351733532
SEEDDIV16352	221937	0.381311181	0.38310279
SEEDDIV16359	158044	0.408638155	0.408198398
SEEDDIV16376	158835	0.368501431	0.371822677
SEEDDIV16384	158822	0.391110844	0.360550259
SEEDDIV16329	157577	0.354594036	0.359959143
SEEDDIV16337	158124	0.393092124	0.39865373
SEEDDIV16345	158525	0.336278963	0.340890591
SEEDDIV16353	221938	0.339937878	0.337388613
SEEDDIV16360	158045	0.372009214	0.371463918
SEEDDIV16377	158837	0.389577267	0.396935365
SEEDDIV16385	158849	0.374832435	0.381218443
SEEDDIV16330	157578	0.386467555	0.391143643
SEEDDIV16338	158518	0.394510647	0.402785615
SEEDDIV16346	158526	0.352135613	0.354884294
SEEDDIV16354	221940	0.379332753	0.374514609
SEEDDIV16378	158838	0.393614412	0.401364474	Selected
SEEDDIV16386	158846	0.395698818	0.398285114
SEEDDIV16323	162106	0.471270685	0.455029991
SEEDDIV16331	158517	0.374309615	0.374835214
SEEDDIV16339	158519	0.404926379	0.408406157
SEEDDIV16347	221932	0.353581648	0.35198069
SEEDDIV16355	221941	0.382502123	0.389222132
SEEDDIV16379	158821	0.424068231	0.429034581
SEEDDIV16387	158847	0.377812822	0.383472672
SEEDDIV16324	158107	0.420212466	0.40773836
SEEDDIV16332	158109	0.386538971	0.38067699
SEEDDIV16340	158520	0.355978576	0.355756193
SEEDDIV16348	221933	0.355372335	0.356646693
SEEDDIV16371	158832	0.438423658	0.445561334
SEEDDIV16394	225692	0.403339527	0.405720123
SEEDDIV16465	157650	0.392903168	0.392391975
SEEDDIV16473	157660	0.392601194	0.398497574
SEEDDIV16481	157629	0.384281357	0.38950095
SEEDDIV16401	225700	0.398464834	0.395043733
SEEDDIV16409	225708	0.397874443	0.403107908
SEEDDIV16417	225716	0.393428423	0.331853386
SEEDDIV16425	225734	0.395614505	0.398166466
SEEDDIV16433	225743	0.4193441	0.421770655
SEEDDIV16441	225725	0.441428149	0.445666126	Selected
SEEDDIV16449	157624	0.382075414	0.351164579
SEEDDIV16395	225693	0.396615737	0.402933774
SEEDDIV16466	157651	0.436102319	0.429548925
SEEDDIV16474	157661	0.447097075	0.453075797	Selected
SEEDDIV16482	157630	0.428805689	0.411073112
SEEDDIV16402	225701	0.411718883	0.4027558
SEEDDIV16410	225709	0.439655375	0.444975502	Selected
SEEDDIV16418	225722	0.660103665	0.663852284	Selected
SEEDDIV16426	225736	0.417863633	0.41873939
SEEDDIV16434	225746	0.400066109	0.407026846
SEEDDIV16450	157636	0.386695256	0.388487981
SEEDDIV16467	157652	0.463058098	0.418876031
SEEDDIV16475	157663	0.424422729	0.426954383
SEEDDIV16483	157634	0.368315157	0.373976912
SEEDDIV16403	225702	0.415499637	0.407698908
SEEDDIV16411	225710	0.395229985	0.401841225
SEEDDIV16419	225717	0.417582128	0.420112581
SEEDDIV16427	225718	0.368934296	0.373741972
SEEDDIV16435	225719	0.370071003	0.37281506
SEEDDIV16443	157612	0.400266521	0.402103033
SEEDDIV16451	157638	0.451789287	0.45491303	Selected
SEEDDIV16459	157645	0.449369262	0.402730001
SEEDDIV16397	225695	0.399075564	0.400016902
SEEDDIV16476	157664	0.449547527	0.439373654	Selected
SEEDDIV16484	157635	0.396392515	0.398953582
SEEDDIV16404	225703	0.440480401	0.431812827
SEEDDIV16412	225711	0.438789409	0.446086401	Selected
SEEDDIV16420	225727	0.435885233	0.439116291
SEEDDIV16428	225737	0.418252404	0.424137817	Selected
SEEDDIV16436	225747	0.383783402	0.386419944
SEEDDIV16444	157613	0.379511951	0.385332861
SEEDDIV16452	157623	0.410662204	0.417859735
SEEDDIV16460	157626	0.381954056	0.385933687
SEEDDIV16469	157627	0.354871588	0.318585367
SEEDDIV16477	157665	0.447066751	0.444528952	Selected
SEEDDIV16485	157668	0.390179784	0.390789074
SEEDDIV16405	225704	0.422438769	0.407828086
SEEDDIV16413	225712	0.442032596	0.445330275	Selected
SEEDDIV16421	225728	0.438972878	0.44575977	Selected
SEEDDIV16429	225738	0.398044756	0.395287241
SEEDDIV16437	225748	0.441666276	0.442839151
SEEDDIV16445	157617	0.401606274	0.409088174
SEEDDIV16453	157622	0.376037697	0.378857539
SEEDDIV16461	157646	0.448580571	0.442485119	Selected
SEEDDIV16398	225696	0.402765663	0.408773354
SEEDDIV16470	157656	0.391726659	0.396023974
SEEDDIV16478	157628	0.387081898	0.383650062
SEEDDIV16486	150999	0.383007277	0.382699524
SEEDDIV16406	225705	0.440125368	0.433567281
SEEDDIV16414	225713	0.39117146	0.359991683
SEEDDIV16422	225729	0.444372611	0.454162461	Selected
SEEDDIV16430	225739	0.411751324	0.413435143
SEEDDIV16438	225720	0.442121448	0.442437202	Selected
SEEDDIV16446	157618	0.412804128	0.415297766
SEEDDIV16454	157637	0.378331756	0.377866416
SEEDDIV16462	157647	0.40876459	0.410537691
SEEDDIV16399	225697	0.434535566	0.443521648	Selected
SEEDDIV16471	157657	0.393834456	0.401076344
SEEDDIV16479	157666	0.43682169	0.43856055	Selected
SEEDDIV16407	225706	0.423810804	0.419345852
SEEDDIV16415	225714	0.443932468	0.449634821	Selected
SEEDDIV16423	225730	0.431757664	0.441390498
SEEDDIV16431	225741	0.365588959	0.36883942
SEEDDIV16439	225724	0.442515828	0.451512044	Selected
SEEDDIV16447	157619	0.430085012	0.432691455	Selected
SEEDDIV16455	157639	0.386775062	0.387155341
SEEDDIV16463	157648	0.411034586	0.337395427
SEEDDIV16400	225698	0.56330982	0.570291125	Selected
SEEDDIV16472	157658	0.392579503	0.397492724
SEEDDIV16480	157667	0.436033357	0.439775335
SEEDDIV16408	225707	0.405308747	0.397658041
SEEDDIV16416	225715	0.436018077	0.445015139	Selected
SEEDDIV16424	225731	0.384272482	0.383415878
SEEDDIV16432	225742	0.441985427	0.452160686	Selected
SEEDDIV16440	157620	0.397001344	0.394826901
SEEDDIV16448	157625	0.404695712	0.24378057
SEEDDIV16456	157640	0.384198897	0.388238416
SEEDDIV16464	157649	0.400614288	0.409649144
SEEDDIV1035	194587	0.425955027	0.418268964
SEEDDIV1107	194665	0.397470328	0.406613077
SEEDDIV1115	194672	0.380778923	0.39247553
SEEDDIV1123	194627	0.406630576	0.411307552
SEEDDIV1043	194594	0.402705701	0.414932155
SEEDDIV1051	194723	0.334629477	0.343384821
SEEDDIV1059	194730	0.351511508	0.356188683
SEEDDIV1067	194737	0.351004773	0.341798271
SEEDDIV1075	194636	0.41366638	0.420008242
SEEDDIV1083	194643	0.357337035	0.366746919
SEEDDIV1091	194624	0.424253218	0.4016938
SEEDDIV1099	194658	0.380946947	0.38838817
SEEDDIV1036	194588	0.431010142	0.417896265
SEEDDIV1108	194666	0.394856008	0.404489707
SEEDDIV1116	194674	0.378372118	0.383980326
SEEDDIV1124	194681	0.355226603	0.359477353
SEEDDIV1044	194595	0.434052718	0.446675247	Selected
SEEDDIV1052	194724	0.351875846	0.35979595
SEEDDIV1060	194632	0.390708137	0.391789623
SEEDDIV1068	194738	0.346305551	0.344849819
SEEDDIV1076	194637	0.419378483	0.430481112	Selected
SEEDDIV1084	194644	0.365991978	0.368655807
SEEDDIV1092	194651	0.358718508	0.364495911
SEEDDIV1100	194659	0.357284798	0.367968463
SEEDDIV1037	194507	0.435312596	0.428845913
SEEDDIV1109	194667	0.392174455	0.401486487
SEEDDIV1125	194683	0.396304778	0.401295333
SEEDDIV1045	194596	0.425568926	0.431686694
SEEDDIV1053	194725	0.380246841	0.387844684	Selected
SEEDDIV1061	194731	0.350561471	0.351724582
SEEDDIV1069	194739	0.347144863	0.347843193
SEEDDIV1077	194638	0.403792567	0.407060927
SEEDDIV1085	194645	0.389019441	0.396056306
SEEDDIV1093	194652	0.394471768	0.401292479
SEEDDIV1101	194660	0.383069754	0.389156441
SEEDDIV1038	194589	0.386778883	0.337205007
SEEDDIV1110	194668	0.399600673	0.411197857
SEEDDIV1118	194677	0.368202355	0.372229161
SEEDDIV1046	194597	0.43699174	0.445328847
SEEDDIV1054	194726	0.416046358	0.421168705
SEEDDIV1062	194732	0.352434745	0.359406212
SEEDDIV1070	194740	0.345573628	0.35074308
SEEDDIV1078	194639	0.359279897	0.36534345
SEEDDIV1086	194646	0.373550897	0.383068937
SEEDDIV1094	194653	0.353437834	0.36314723
SEEDDIV1102	194625	0.418998131	0.430252967
SEEDDIV1039	194590	0.42430503	0.395894577
SEEDDIV1111	194669	0.390794081	0.397933155
SEEDDIV1119	194678	0.406332411	0.396689231
SEEDDIV1127	194685	0.386875167	0.377121906
SEEDDIV1047	194598	0.405634635	0.41520544
SEEDDIV1055	194727	0.344170253	0.30970335
SEEDDIV1063	194733	0.361070625	0.367721458
SEEDDIV1071	194633	0.392223273	0.38780749
SEEDDIV1079	194640	0.358037824	0.361027023
SEEDDIV1087	194647	0.384345963	0.393678802
SEEDDIV1095	194654	0.396145027	0.398952509
SEEDDIV1103	194661	0.390018461	0.398795164
SEEDDIV1040	194591	0.443175837	0.438292299
SEEDDIV1112	194670	0.380956594	0.386154651
SEEDDIV1120	194679	0.375221923	0.37890078
SEEDDIV1128	194686	0.357133412	0.361025325
SEEDDIV1048	194622	0.445411854	0.452691633	Selected
SEEDDIV1056	194728	0.348940103	0.353378629
SEEDDIV1064	194734	0.341437518	0.346352723
SEEDDIV1072	194741	0.348142068	0.352181421
SEEDDIV1080	194623	0.405541862	0.412569944
SEEDDIV1088	194648	0.388243891	0.395454998
SEEDDIV1096	194655	0.393520214	0.399769094
SEEDDIV1104	194662	0.399545608	0.407537682
SEEDDIV1041	194592	0.442034938	0.42565273
SEEDDIV1113	194626	0.402487726	0.404817277
SEEDDIV1057	194729	0.377983656	0.385235885	Selected
SEEDDIV1065	194735	0.346003395	0.335531558
SEEDDIV1073	194634	0.394976926	0.401958879
SEEDDIV1081	194641	0.39555653	0.398838959
SEEDDIV1089	194649	0.372083281	0.381965697
SEEDDIV1097	194656	0.393000307	0.401214529
SEEDDIV1105	194663	0.391735257	0.3992089
SEEDDIV1042	194593	0.438268298	0.432307883
SEEDDIV1114	194671	0.45550483	0.463219162	Selected
SEEDDIV1122	194680	0.432446379	0.442984439
SEEDDIV1050	194721	0.351829958	0.356537718
SEEDDIV1058	191058	0.387722542	0.391813886
SEEDDIV1066	194736	0.347282724	0.357478166
SEEDDIV1074	194635	0.416264835	0.416437633
SEEDDIV1082	194642	0.395557864	0.399144168
SEEDDIV1090	194650	0.351573126	0.360473454
SEEDDIV1098	194657	0.371507919	0.37053575
SEEDDIV1106	194664	0.396605152	0.398249703
SEEDDIV16581	223783	0.470101032	0.468634614
SEEDDIV16653	223869	0.35206396	0.357926435
SEEDDIV16661	223877	0.356692838	0.367111373
SEEDDIV16669	223833	0.449248247	0.45941141
SEEDDIV16589	223738	0.428071884	0.43145948
SEEDDIV16597	223799	0.444375496	0.457240202	Selected
SEEDDIV16605	223807	0.437548594	0.45135013
SEEDDIV16613	223814	0.421241861	0.429622215
SEEDDIV16621	223838	0.455230297	0.46348878
SEEDDIV16629	223846	0.45440221	0.461922078
SEEDDIV16637	223854	0.396362206	0.404398247
SEEDDIV16645	223861	0.431862825	0.444021998
SEEDDIV16582	223784	0.429755806	0.415621068
SEEDDIV16654	223870	0.370158717	0.374258086
SEEDDIV16662	223878	0.363643899	0.370176056
SEEDDIV16670	223887	0.451431393	0.462585034
SEEDDIV16590	223792	0.381793389	0.387634834
SEEDDIV16598	223800	0.437623764	0.447116063
SEEDDIV16606	223808	0.444771705	0.456279441	Selected
SEEDDIV16614	223815	0.439974922	0.451165495
SEEDDIV16622	223839	0.45699033	0.467076185	Selected
SEEDDIV16630	223847	0.405592956	0.38272332
SEEDDIV16638	223855	0.440767837	0.451917765
SEEDDIV16646	223862	0.443204814	0.453409915
SEEDDIV16583	223785	0.434216636	0.437515837
SEEDDIV16655	223871	0.449102372	0.454820723
SEEDDIV16663	223880	0.457823954	0.470238252	Selected
SEEDDIV16671	223888	0.457486367	0.466629149
SEEDDIV16591	223793	0.473417473	0.478437101
SEEDDIV16599	223801	0.434886026	0.44556794
SEEDDIV16607	223809	0.460440833	0.468918536
SEEDDIV16615	223816	0.442339739	0.452296383
SEEDDIV16623	223840	0.575689576	0.497320513	Selected
SEEDDIV16639	223856	0.43574917	0.448623069
SEEDDIV16647	223863	0.439680473	0.449974221
SEEDDIV16584	223787	0.436645636	0.434003176
SEEDDIV16656	223872	0.454326558	0.462701113
SEEDDIV16664	223881	0.461672073	0.467159441
SEEDDIV16672	223889	0.463204952	0.468137745	Selected
SEEDDIV16592	223794	0.437679257	0.44510871
SEEDDIV16600	223802	0.433684317	0.443164717
SEEDDIV16608	223810	0.430867582	0.440862566
SEEDDIV16616	223818	0.435497633	0.431297251
SEEDDIV16632	223849	0.429125906	0.438845118
SEEDDIV16640	223830	0.451487105	0.459847675
SEEDDIV16648	223864	0.441697775	0.450788327
SEEDDIV16585	223788	0.43215097	0.431313628
SEEDDIV16657	223874	0.364530471	0.37345668
SEEDDIV16665	223882	0.446871863	0.456532374
SEEDDIV16593	223795	0.434026242	0.44473586
SEEDDIV16601	223803	0.44092859	0.445986546
SEEDDIV16609	223811	0.443614494	0.452594568
SEEDDIV16617	223819	0.364778413	0.373004541
SEEDDIV16625	223841	0.450080139	0.458865394
SEEDDIV16633	223850	0.428335738	0.437398909
SEEDDIV16641	223857	0.439908941	0.45000802
SEEDDIV16649	223865	0.436933047	0.445897162
SEEDDIV16586	223789	0.423161704	0.419977569
SEEDDIV16658	223875	0.362745549	0.374119488
SEEDDIV16666	223883	0.455723788	0.464564052
SEEDDIV16674	223835	0.428364272	0.440672274
SEEDDIV16594	223796	0.432429734	0.44094534
SEEDDIV16602	223804	0.432468289	0.44304555
SEEDDIV16618	223820	0.433638305	0.447163252
SEEDDIV16626	223842	0.451235433	0.461333456
SEEDDIV16634	223851	0.42648376	0.432709471
SEEDDIV16642	223858	0.442447045	0.44683907
SEEDDIV16650	223866	0.385038853	0.394824769
SEEDDIV16587	223790	0.435530836	0.431744047
SEEDDIV16659	223876	0.423109186	0.435273011
SEEDDIV16667	223884	0.356935338	0.371977538
SEEDDIV16595	223797	0.276216136	0.282630246
SEEDDIV16603	223805	0.460786267	0.471706465
SEEDDIV16611	223812	0.437872967	0.448051605
SEEDDIV16619	223741	0.473762307	0.4820235	Selected
SEEDDIV16627	223843	0.368242539	0.375428912
SEEDDIV16635	223852	0.423409032	0.434726774
SEEDDIV16643	223859	0.435193998	0.44020612
SEEDDIV16651	223867	0.434436957	0.448004703
SEEDDIV16660	223832	0.449631638	0.461877037
SEEDDIV16668	223885	0.431238866	0.444508672
SEEDDIV16596	223798	0.334388593	0.345413965
SEEDDIV16612	223813	0.385598686	0.400611028
SEEDDIV16620	223837	0.366856002	0.376091512
SEEDDIV16628	223844	0.451600452	0.464416179
SEEDDIV16636	223853	0.440156199	0.451637173
SEEDDIV16644	223860	0.390506078	0.400503984
SEEDDIV16652	223868	0.555301394	0.554855687	Selected
SEEDDIV16747	225201	0.424705339	0.422588586
SEEDDIV16755	225208	0.444736236	0.453480083
SEEDDIV16763	225215	0.481447071	0.459974928
SEEDDIV16683	225123	0.37187485	0.375706709
SEEDDIV16691	225131	0.460946051	0.467923364	Selected
SEEDDIV16699	225141	0.449043772	0.415390748
SEEDDIV16707	225149	0.430781274	0.43394638
SEEDDIV16715	225160	0.465342991	0.467185514
SEEDDIV16723	225170	0.451768696	0.455157315
SEEDDIV16731	225184	0.458052833	0.464720665
SEEDDIV16739	225192	0.458832838	0.467182466	Selected
SEEDDIV16676	223890	0.394629369	0.367118194
SEEDDIV16748	225202	0.462186618	0.465965306
SEEDDIV16756	225209	0.442519927	0.452086883
SEEDDIV16684	225124	0.45642746	0.462526933
SEEDDIV16692	225132	0.462107504	0.468142274	Selected
SEEDDIV16700	225142	0.455849377	0.458458499
SEEDDIV16708	225151	0.455482756	0.463063835
SEEDDIV16716	225162	0.460990093	0.468363356	Selected
SEEDDIV16724	225171	0.448305463	0.432816651
SEEDDIV16732	225185	0.463232243	0.469453944	Selected
SEEDDIV16740	225193	0.458732026	0.466417448
SEEDDIV16677	225117	0.388856929	0.372969685
SEEDDIV16749	225174	0.454651642	0.460259216
SEEDDIV16757	225210	0.443985681	0.453071414
SEEDDIV16685	225125	0.363498416	0.364385064
SEEDDIV16693	225133	0.461632684	0.467798459	Selected
SEEDDIV16701	225143	0.385442928	0.383921244
SEEDDIV16709	225152	0.464732217	0.465834429
SEEDDIV16717	225163	0.370271224	0.369743228
SEEDDIV16725	225114	0.38276894	0.364990556
SEEDDIV16733	225186	0.447866033	0.460039999	Selected
SEEDDIV16741	225194	0.42970017	0.430718682
SEEDDIV16678	225118	0.457398564	0.434021229
SEEDDIV16750	225203	0.463513322	0.470957816	Selected
SEEDDIV16758	225211	0.466009817	0.465286588
SEEDDIV16765	225217	0.467089022	0.476004869	Selected
SEEDDIV16686	225126	0.428787138	0.43778492
SEEDDIV16694	225137	0.458257012	0.465373467
SEEDDIV16702	225144	0.455421109	0.459588403
SEEDDIV16710	225153	0.392696954	0.396588514
SEEDDIV16718	225164	0.461730362	0.461402963
SEEDDIV16726	225115	0.455086983	0.462137332
SEEDDIV16734	225187	0.455812122	0.462297725
SEEDDIV16742	225195	0.432523384	0.437044487
SEEDDIV16679	225119	0.464934188	0.460490614
SEEDDIV16751	225204	0.466514612	0.467694921	Selected
SEEDDIV16759	225212	0.447560209	0.456299721	Selected
SEEDDIV16766	225218	0.447072323	0.449502963
SEEDDIV16687	223891	0.45522775	0.464259875
SEEDDIV16695	225138	0.422719249	0.427301251
SEEDDIV16703	225145	0.374909663	0.375951575
SEEDDIV16711	225154	0.469414593	0.473182964	Selected
SEEDDIV16719	225165	0.455719711	0.460156522
SEEDDIV16727	225116	0.465585287	0.469637454	Selected
SEEDDIV16735	225188	0.463040565	0.464713988
SEEDDIV16743	225196	0.459807238	0.469580508	Selected
SEEDDIV16680	225120	0.461350757	0.456568704
SEEDDIV16752	225205	0.464538457	0.470996558	Selected
SEEDDIV16760	225175	0.460998527	0.463695525
SEEDDIV16767	225219	0.464787298	0.473071517	Selected
SEEDDIV16688	225127	0.431826905	0.443078862
SEEDDIV16696	225110	0.377974299	0.369747804
SEEDDIV16704	225147	0.42996555	0.43536521
SEEDDIV16712	225155	0.461981822	0.469134926	Selected
SEEDDIV16720	225166	0.3633282	0.368891632
SEEDDIV16728	225172	0.431935991	0.436833982
SEEDDIV16736	225189	0.460743529	0.469613658	Selected
SEEDDIV16744	225197	0.456362545	0.460763249
SEEDDIV16681	225121	0.41842284	0.380799987
SEEDDIV16753	225206	0.456326465	0.46621319
SEEDDIV16761	225213	0.441671359	0.450425118
SEEDDIV16697	225139	0.48016786	0.487576399	Selected
SEEDDIV16705	225148	0.415635837	0.390505124
SEEDDIV16713	225156	0.364703642	0.365074553
SEEDDIV16721	225167	0.460064806	0.460550081
SEEDDIV16729	225182	0.45535114	0.462377344
SEEDDIV16737	225190	0.458374519	0.467330398	Selected
SEEDDIV16745	225198	0.456374194	0.456606726
SEEDDIV16682	225122	0.455703969	0.442787087
SEEDDIV16754	225207	0.432533701	0.441625742
SEEDDIV16762	225214	0.461359449	0.460119521
SEEDDIV16690	225129	0.418200083	0.410661083
SEEDDIV16698	225140	0.386084711	0.350122495
SEEDDIV16706	225111	0.45498237	0.451365554
SEEDDIV16714	225112	0.373605261	0.376441191
SEEDDIV16722	225168	0.359880319	0.363485207
SEEDDIV16730	225183	0.451443177	0.457958473
SEEDDIV16738	225173	0.467682155	0.436791963
SEEDDIV16746	225200	0.425607019	0.432256955
SEEDDIV16768	225220	0.467481222	0.456095441
SEEDDIV16840	162073	0.399447512	0.405009248
SEEDDIV16848	162343	0.39198954	0.397308873
SEEDDIV16856	162350	0.378694463	0.383327333
SEEDDIV16776	225228	0.439679938	0.445857846
SEEDDIV16784	191808	0.427951391	0.438841927
SEEDDIV16792	191819	0.455026282	0.444090498	Selected
SEEDDIV16800	191841	0.433665414	0.444048559	Selected
SEEDDIV16808	225488	0.471680248	0.449194937
SEEDDIV16816	225560	0.42476754	0.435170545
SEEDDIV16824	225529	0.434098158	0.379911923
SEEDDIV16769	225221	0.452912161	0.412686206
SEEDDIV16841	162074	0.428906834	0.429874271
SEEDDIV16849	162344	0.374706534	0.380302651
SEEDDIV16857	162351	0.386712105	0.37679403
SEEDDIV16777	225229	0.444300716	0.446905703
SEEDDIV16785	191811	0.392454859	0.398403857
SEEDDIV16801	191843	0.438731332	0.441785063
SEEDDIV16809	225486	0.428745498	0.426551388
SEEDDIV16817	225561	0.460275902	0.465441257	Selected
SEEDDIV16825	225530	0.458084031	0.466865401	Selected
SEEDDIV16770	225222	0.46410328	0.458170006
SEEDDIV16842	162294	0.372921432	0.370859463
SEEDDIV16850	162345	0.389922194	0.394750615
SEEDDIV16858	162352	0.568376532	0.567757017	Selected
SEEDDIV16778	191800	0.437175429	0.443827921	Selected
SEEDDIV16794	191823	0.440656349	0.44829402	Selected
SEEDDIV16802	225454	0.443742849	0.449335038
SEEDDIV16810	225459	0.429356905	0.435517736
SEEDDIV16818	225563	0.431629837	0.435790189
SEEDDIV16771	225176	0.463808109	0.459835002
SEEDDIV16843	162328	0.384554249	0.384102318
SEEDDIV16851	162346	0.402716104	0.394356844
SEEDDIV16859	162353	0.382672239	0.382429826
SEEDDIV16779	191801	0.446648191	0.452430977	Selected
SEEDDIV16787	191815	0.439855468	0.440715443
SEEDDIV16803	225535	0.425696303	0.432874908
SEEDDIV16811	225487	0.598145629	0.597046915	Selected
SEEDDIV16819	225565	0.466427348	0.470074513	Selected
SEEDDIV16772	225224	0.470406301	0.463681708
SEEDDIV16844	162339	0.379260996	0.380921179
SEEDDIV16852	162347	0.41013209	0.408393586
SEEDDIV16860	162354	0.391401616	0.39229984
SEEDDIV16780	191802	0.368291582	0.370712467
SEEDDIV16788	191816	0.432567611	0.437003366
SEEDDIV16796	191827	0.411384524	0.415950801
SEEDDIV16804	225457	0.438918807	0.442125209
SEEDDIV16812	225503	0.422307377	0.421504334
SEEDDIV16820	225566	0.441134073	0.446320591
SEEDDIV16828	157653	0.441069108	0.435797505
SEEDDIV16836	162031	0.4467501	0.433371355
SEEDDIV16773	225225	0.46321741	0.463589906
SEEDDIV16845	162340	0.388322519	0.376301309
SEEDDIV16853	162348	0.378111655	0.38036271
SEEDDIV16861	162355	0.370616901	0.375337885
SEEDDIV16781	191805	0.450175007	0.456399318	Selected
SEEDDIV16789	191762	0.414763225	0.422599524	Selected
SEEDDIV16797	191763	0.424122179	0.42881097	Selected
SEEDDIV16805	225473	0.444659281	0.454930288	Selected
SEEDDIV16813	225461	0.441175974	0.383722957
SEEDDIV16821	225572	0.449323388	0.4601703	Selected
SEEDDIV16837	162071	0.422854667	0.428712038
SEEDDIV16774	225226	0.472134368	0.463161236
SEEDDIV16846	162341	0.38726996	0.389619156
SEEDDIV16854	162329	0.38133091	0.35055143
SEEDDIV16782	191806	0.355081666	0.359372596
SEEDDIV16790	191817	0.43311072	0.43700815
SEEDDIV16798	191765	0.420138829	0.416750302
SEEDDIV16806	225474	0.42721432	0.430184812
SEEDDIV16814	225558	0.435025099	0.395658638
SEEDDIV16822	225514	0.443953878	0.450139266
SEEDDIV16838	162077	0.400260564	0.410124295
SEEDDIV16775	225227	0.455322786	0.442785459
SEEDDIV16847	162342	0.377171684	0.38480758
SEEDDIV16855	162349	0.371050929	0.376970343
SEEDDIV16783	191807	0.496874237	0.509730707	Selected
SEEDDIV16791	191818	0.435636848	0.444575588	Selected
SEEDDIV16799	191831	0.45143802	0.4507736	Selected
SEEDDIV16807	225481	0.43885112	0.442987646	Selected
SEEDDIV16815	225559	0.448369522	0.454659437	Selected
SEEDDIV16823	225520	0.424765941	0.431048019
SEEDDIV16839	162076	0.383748695	0.385228854
SEEDDIV16862	162356	0.263996064	0.272470153
SEEDDIV16934	157540	0.360107349	0.364050633
SEEDDIV16942	157526	0.392789826	0.381733019
SEEDDIV16950	157555	0.389550292	0.393825209
SEEDDIV16870	162366	0.436530164	0.420860616
SEEDDIV16878	162337	0.328552144	0.329688112
SEEDDIV16886	157724	0.343353997	0.329115867
SEEDDIV16894	162376	0.381940997	0.379991357
SEEDDIV16910	151230	0.397692602	0.407983185
SEEDDIV16935	157541	0.383079731	0.388537224
SEEDDIV16943	157545	0.398300428	0.407928532
SEEDDIV16951	157550	0.40935326	0.403681332
SEEDDIV16871	162368	0.359783003	0.358583613
SEEDDIV16879	162338	0.370916457	0.364459014
SEEDDIV16887	157723	0.421087923	0.426851425
SEEDDIV16895	157711	0.394663224	0.38984649
SEEDDIV16911	151231	0.428505325	0.436293014
SEEDDIV16927	151207	0.391408557	0.390290187
SEEDDIV16864	162330	0.166852929	0.172499588
SEEDDIV16936	157538	0.381529638	0.383878512
SEEDDIV16944	157546	0.381214872	0.374663025
SEEDDIV16952	157548	0.392412054	0.39939751
SEEDDIV16872	162370	0.40137126	0.397433943
SEEDDIV16880	162372	0.392974466	0.403244827
SEEDDIV16888	157721	0.386272391	0.38881832
SEEDDIV16896	157710	0.373914016	0.370310117
SEEDDIV16928	151208	0.436866082	0.436616731	Selected
SEEDDIV16937	157543	0.401287352	0.406591368
SEEDDIV16945	157547	0.39111496	0.393928437
SEEDDIV16953	157551	0.395117091	0.402452101
SEEDDIV16873	162371	0.399565885	0.383549279
SEEDDIV16881	162382	0.3952803	0.393414706
SEEDDIV16889	157712	0.385301708	0.394458531
SEEDDIV16897	157709	0.356885159	0.363765892
SEEDDIV16929	151209	0.384260426	0.38908812
SEEDDIV16938	157535	0.386804492	0.39651041
SEEDDIV16954	157557	0.388180438	0.389352722
SEEDDIV16874	162331	0.401017841	0.392422232
SEEDDIV16882	157725	0.404604459	0.411352329
SEEDDIV16890	162380	0.393679043	0.393459681
SEEDDIV16898	157708	0.39396465	0.38950324
SEEDDIV16906	157910	0.381436249	0.384280197
SEEDDIV16914	151205	0.414076291	0.406627023
SEEDDIV16930	151210	0.422403135	0.4313764
SEEDDIV16867	162362	0.233418071	0.237751086
SEEDDIV16939	157539	0.381021405	0.384988718
SEEDDIV16947	157559	0.367736547	0.375737929
SEEDDIV16955	157554	0.366954244	0.367367002
SEEDDIV16883	157730	0.408505996	0.415869199
SEEDDIV16891	162379	0.410820728	0.321014465
SEEDDIV16899	157707	0.385233521	0.387583291
SEEDDIV16868	162364	0.289937246	0.293772163
SEEDDIV16940	157542	0.372181643	0.381957686
SEEDDIV16948	157549	0.390156093	0.397068437
SEEDDIV16876	162335	0.374872332	0.375200011
SEEDDIV16884	157731	0.360548218	0.368714114
SEEDDIV16892	162378	0.391148665	0.400082488
SEEDDIV16900	157706	0.37309954	0.374698622
SEEDDIV16924	151206	0.388257895	0.392006493
SEEDDIV16932	157536	0.373695579	0.373041333
SEEDDIV16869	162365	0.310692616	0.319206857
SEEDDIV16941	157544	0.406866495	0.4120893
[truncated: 5,987 more rows]
